# Supplementary material for: Pseudomonas aeruginosa Exhibits Frequent Recombination, but Only a Limited Association between Genotype and Ecological Setting
Source: PubMed Central journal article supplement (PMC3435406; doi:10.1371/journal.pone.0044199), 2012-09-06
Supplement: pone.0044199.s003.pdf [file pone.0044199.s003.pdf]

**Figure S3. Results of eBURST analysis for the 499 *Pseudomonas aeruginosa* isolates.**

Total no. of isolates = 499 | Total no. of STs = 272  
 No. of loci per isolate = 7 | No. of identical loci for group definition = 6  
 Total no. of BURST groups detected = 31  
 No. of re-samplings for bootstrapping = 1000

**BURST Group 01: No. of isolates = 43 | No. of STs = 11 | Predicted Founder = ST-241**

| ST  | FREQ | SLV | DLV | TLV | SAT | Average  | ST Bootstrap |          |
|-----|------|-----|-----|-----|-----|----------|--------------|----------|
|     |      |     |     |     |     | Distance | Group        | Subgroup |
| 241 | 2    | 6   | 4   | 0   | 0   | 1.4      | 68%          | 78%      |
| 833 | 1    | 5   | 5   | 0   | 0   | 1.5      | 37%          | 47%      |
| 775 | 14   | 5   | 5   | 0   | 0   | 1.5      | 37%          | 41%      |
| 653 | 1    | 3   | 7   | 0   | 0   | 1.7      | 0%           | 0%       |
| 886 | 1    | 2   | 5   | 3   | 0   | 2.1      | 0%           | 0%       |
| 834 | 1    | 2   | 4   | 4   | 0   | 2.2      | 0%           | 0%       |
| 808 | 1    | 2   | 3   | 5   | 0   | 2.3      | 0%           | 0%       |
| 914 | 1    | 2   | 3   | 5   | 0   | 2.3      | 0%           | 0%       |
| 883 | 16   | 1   | 6   | 3   | 0   | 2.2      | 0%           | 0%       |
| 839 | 1    | 1   | 5   | 4   | 0   | 2.3      | 0%           | 0%       |
| 471 | 4    | 1   | 5   | 4   | 0   | 2.3      | 0%           | 0%       |

**BURST Group 02: No. of isolates = 6 | No. of STs = 4 | Predicted Founder = Multiple**

| ST  | FREQ | SLV | DLV | TLV | SAT | Average  | ST Bootstrap |          |
|-----|------|-----|-----|-----|-----|----------|--------------|----------|
|     |      |     |     |     |     | Distance | Group        | Subgroup |
| 360 | 3    | 2   | 1   | 0   | 0   | 1.33     | 27%          | 0%       |
| 861 | 1    | 2   | 1   | 0   | 0   | 1.33     | 26%          | 0%       |
| 864 | 1    | 1   | 1   | 1   | 0   | 2        | 0%           | 0%       |
| 862 | 1    | 1   | 1   | 1   | 0   | 2        | 0%           | 0%       |

**BURST Group 03: No. of isolates = 7 | No. of STs = 3 | Predicted Founder = ST-252**

| ST  | FREQ | SLV | DLV | TLV | SAT | Average  | ST Bootstrap |          |
|-----|------|-----|-----|-----|-----|----------|--------------|----------|
|     |      |     |     |     |     | Distance | Group        | Subgroup |
| 252 | 4    | 2   | 0   | 0   | 0   | 1        | 29%          | 0%       |
| 924 | 1    | 1   | 1   | 0   | 0   | 1.5      | 0%           | 0%       |
| 9   | 2    | 1   | 1   | 0   | 0   | 1.5      | 0%           | 0%       |

**BURST Group 04: No. of isolates = 7 | No. of STs = 3 | Predicted Founder = ST-385**

| ST  | FREQ | SLV | DLV | TLV | SAT | Average  | ST Bootstrap |          |
|-----|------|-----|-----|-----|-----|----------|--------------|----------|
|     |      |     |     |     |     | Distance | Group        | Subgroup |
| 385 | 5    | 2   | 0   | 0   | 0   | 1        | 31%          | 0%       |
| 443 | 1    | 1   | 1   | 0   | 0   | 1.5      | 0%           | 0%       |
| 920 | 1    | 1   | 1   | 0   | 0   | 1.5      | 0%           | 0%       |

**BURST Group 05: No. of isolates = 16 | No. of STs = 3 | Predicted Founder = ST-155**

| ST  | FREQ | SLV | DLV | TLV | SAT | Average  | ST Bootstrap |          |
|-----|------|-----|-----|-----|-----|----------|--------------|----------|
|     |      |     |     |     |     | Distance | Group        | Subgroup |
| 155 | 14   | 2   | 0   | 0   | 0   | 1        | 35%          | 0%       |
| 786 | 1    | 1   | 1   | 0   | 0   | 1.5      | 0%           | 0%       |
| 13  | 1    | 1   | 1   | 0   | 0   | 1.5      | 0%           | 0%       |

**BURST Group 06: No. of isolates = 5 | No. of STs = 2 | Predicted Founder = None**

| <b>ST</b> | <b>FREQ</b> | <b>SLV</b> | <b>DLV</b> | <b>TLV</b> | <b>SAT</b> | <b>Distance</b> |
|-----------|-------------|------------|------------|------------|------------|-----------------|
| 266       | 4           | 1          | 0          | 0          | 0          | 1               |
| 873       | 1           | 1          | 0          | 0          | 0          | 1               |

**BURST Group 07: No. of isolates = 5 | No. of STs = 2 | Predicted Founder = None**

| <b>ST</b> | <b>FREQ</b> | <b>SLV</b> | <b>DLV</b> | <b>TLV</b> | <b>SAT</b> | <b>Distance</b> |
|-----------|-------------|------------|------------|------------|------------|-----------------|
| 261       | 2           | 1          | 0          | 0          | 0          | 1               |
| 810       | 3           | 1          | 0          | 0          | 0          | 1               |

**BURST Group 08: No. of isolates = 2 | No. of STs = 2 | Predicted Founder = None**

| <b>ST</b> | <b>FREQ</b> | <b>SLV</b> | <b>DLV</b> | <b>TLV</b> | <b>SAT</b> | <b>Distance</b> |
|-----------|-------------|------------|------------|------------|------------|-----------------|
| 859       | 1           | 1          | 0          | 0          | 0          | 1               |
| 858       | 1           | 1          | 0          | 0          | 0          | 1               |

**BURST Group 09: No. of isolates = 3 | No. of STs = 2 | Predicted Founder = None**

| <b>ST</b> | <b>FREQ</b> | <b>SLV</b> | <b>DLV</b> | <b>TLV</b> | <b>SAT</b> | <b>Distance</b> |
|-----------|-------------|------------|------------|------------|------------|-----------------|
| 655       | 2           | 1          | 0          | 0          | 0          | 1               |
| 709       | 1           | 1          | 0          | 0          | 0          | 1               |

**BURST Group 10: No. of isolates = 3 | No. of STs = 2 | Predicted Founder = None**

| <b>ST</b> | <b>FREQ</b> | <b>SLV</b> | <b>DLV</b> | <b>TLV</b> | <b>SAT</b> | <b>Distance</b> |
|-----------|-------------|------------|------------|------------|------------|-----------------|
| 257       | 2           | 1          | 0          | 0          | 0          | 1               |
| 780       | 1           | 1          | 0          | 0          | 0          | 1               |

**BURST Group 11: No. of isolates = 16 | No. of STs = 2 | Predicted Founder = None**

| <b>ST</b> | <b>FREQ</b> | <b>SLV</b> | <b>DLV</b> | <b>TLV</b> | <b>SAT</b> | <b>Distance</b> |
|-----------|-------------|------------|------------|------------|------------|-----------------|
| 253       | 15          | 1          | 0          | 0          | 0          | 1               |
| 828       | 1           | 1          | 0          | 0          | 0          | 1               |

**BURST Group 12: No. of isolates = 2 | No. of STs = 2 | Predicted Founder = None**

| <b>ST</b> | <b>FREQ</b> | <b>SLV</b> | <b>DLV</b> | <b>TLV</b> | <b>SAT</b> | <b>Distance</b> |
|-----------|-------------|------------|------------|------------|------------|-----------------|
| 848       | 1           | 1          | 0          | 0          | 0          | 1               |
| 569       | 1           | 1          | 0          | 0          | 0          | 1               |

**BURST Group 13: No. of isolates = 2 | No. of STs = 2 | Predicted Founder = None**

| <b>ST</b> | <b>FREQ</b> | <b>SLV</b> | <b>DLV</b> | <b>TLV</b> | <b>SAT</b> | <b>Distance</b> |
|-----------|-------------|------------|------------|------------|------------|-----------------|
| 847       | 1           | 1          | 0          | 0          | 0          | 1               |
| 896       | 1           | 1          | 0          | 0          | 0          | 1               |

**BURST Group 14: No. of isolates = 7 | No. of STs = 2 | Predicted Founder = None**

| <b>ST</b> | <b>FREQ</b> | <b>SLV</b> | <b>DLV</b> | <b>TLV</b> | <b>SAT</b> | <b>Distance</b> |
|-----------|-------------|------------|------------|------------|------------|-----------------|
| 845       | 3           | 1          | 0          | 0          | 0          | 1               |
| 17        | 4           | 1          | 0          | 0          | 0          | 1               |

**BURST Group 15: No. of isolates = 2 | No. of STs = 2 | Predicted Founder = None**

| <b>ST</b> | <b>FREQ</b> | <b>SLV</b> | <b>DLV</b> | <b>TLV</b> | <b>SAT</b> | <b>Distance</b> |
|-----------|-------------|------------|------------|------------|------------|-----------------|
| 843       | 1           | 1          | 0          | 0          | 0          | 1               |
| 3         | 1           | 1          | 0          | 0          | 0          | 1               |

**BURST Group 16: No. of isolates = 6 | No. of STs = 2 | Predicted Founder = None**

| <b>ST</b> | <b>FREQ</b> | <b>SLV</b> | <b>DLV</b> | <b>TLV</b> | <b>SAT</b> | <b>Distance</b> |
|-----------|-------------|------------|------------|------------|------------|-----------------|
| 446       | 5           | 1          | 0          | 0          | 0          | 1               |
| 298       | 1           | 1          | 0          | 0          | 0          | 1               |

**BURST Group 17: No. of isolates = 3 | No. of STs = 2 | Predicted Founder = None**

| <b>ST</b> | <b>FREQ</b> | <b>SLV</b> | <b>DLV</b> | <b>TLV</b> | <b>SAT</b> | <b>Distance</b> |
|-----------|-------------|------------|------------|------------|------------|-----------------|
| 245       | 2           | 1          | 0          | 0          | 0          | 1               |
| 142       | 1           | 1          | 0          | 0          | 0          | 1               |

**BURST Group 18: No. of isolates = 2 | No. of STs = 2 | Predicted Founder = None**

| <b>ST</b> | <b>FREQ</b> | <b>SLV</b> | <b>DLV</b> | <b>TLV</b> | <b>SAT</b> | <b>Distance</b> |
|-----------|-------------|------------|------------|------------|------------|-----------------|
| 835       | 1           | 1          | 0          | 0          | 0          | 1               |
| 891       | 1           | 1          | 0          | 0          | 0          | 1               |

**BURST Group 19: No. of isolates = 3 | No. of STs = 2 | Predicted Founder = None**

| <b>ST</b> | <b>FREQ</b> | <b>SLV</b> | <b>DLV</b> | <b>TLV</b> | <b>SAT</b> | <b>Distance</b> |
|-----------|-------------|------------|------------|------------|------------|-----------------|
| 235       | 2           | 1          | 0          | 0          | 0          | 1               |
| 141       | 1           | 1          | 0          | 0          | 0          | 1               |

**BURST Group 20: No. of isolates = 3 | No. of STs = 2 | Predicted Founder = None**

| <b>ST</b> | <b>FREQ</b> | <b>SLV</b> | <b>DLV</b> | <b>TLV</b> | <b>SAT</b> | <b>Distance</b> |
|-----------|-------------|------------|------------|------------|------------|-----------------|
| 223       | 1           | 1          | 0          | 0          | 0          | 1               |
| 309       | 2           | 1          | 0          | 0          | 0          | 1               |

**BURST Group 21: No. of isolates = 2 | No. of STs = 2 | Predicted Founder = None**

| <b>ST</b> | <b>FREQ</b> | <b>SLV</b> | <b>DLV</b> | <b>TLV</b> | <b>SAT</b> | <b>Distance</b> |
|-----------|-------------|------------|------------|------------|------------|-----------------|
| 214       | 1           | 1          | 0          | 0          | 0          | 1               |
| 917       | 1           | 1          | 0          | 0          | 0          | 1               |

**BURST Group 22: No. of isolates = 2 | No. of STs = 2 | Predicted Founder = None**

| <b>ST</b> | <b>FREQ</b> | <b>SLV</b> | <b>DLV</b> | <b>TLV</b> | <b>SAT</b> | <b>Distance</b> |
|-----------|-------------|------------|------------|------------|------------|-----------------|
| 806       | 1           | 1          | 0          | 0          | 0          | 1               |
| 805       | 1           | 1          | 0          | 0          | 0          | 1               |

**BURST Group 23: No. of isolates = 5 | No. of STs = 2 | Predicted Founder = None**

| <b>ST</b> | <b>FREQ</b> | <b>SLV</b> | <b>DLV</b> | <b>TLV</b> | <b>SAT</b> | <b>Distance</b> |
|-----------|-------------|------------|------------|------------|------------|-----------------|
| 174       | 1           | 1          | 0          | 0          | 0          | 1               |
| 313       | 4           | 1          | 0          | 0          | 0          | 1               |

**BURST Group 24: No. of isolates = 4 | No. of STs = 2 | Predicted Founder = None**

| <b>ST</b> | <b>FREQ</b> | <b>SLV</b> | <b>DLV</b> | <b>TLV</b> | <b>SAT</b> | <b>Distance</b> |
|-----------|-------------|------------|------------|------------|------------|-----------------|
| 803       | 3           | 1          | 0          | 0          | 0          | 1               |
| 866       | 1           | 1          | 0          | 0          | 0          | 1               |

**BURST Group 25: No. of isolates = 7 | No. of STs = 2 | Predicted Founder = None**

| <b>ST</b> | <b>FREQ</b> | <b>SLV</b> | <b>DLV</b> | <b>TLV</b> | <b>SAT</b> | <b>Distance</b> |
|-----------|-------------|------------|------------|------------|------------|-----------------|
| 801       | 6           | 1          | 0          | 0          | 0          | 1               |
| 4         | 1           | 1          | 0          | 0          | 0          | 1               |

**BURST Group 26: No. of isolates = 19 | No. of STs = 2 | Predicted Founder = None**

| <b>ST</b> | <b>FREQ</b> | <b>SLV</b> | <b>DLV</b> | <b>TLV</b> | <b>SAT</b> | <b>Distance</b> |
|-----------|-------------|------------|------------|------------|------------|-----------------|
| 209       | 1           | 1          | 0          | 0          | 0          | 1               |
| 274       | 18          | 1          | 0          | 0          | 0          | 1               |

**BURST Group 27: No. of isolates = 5 | No. of STs = 2 | Predicted Founder = None**

| <b>ST</b> | <b>FREQ</b> | <b>SLV</b> | <b>DLV</b> | <b>TLV</b> | <b>SAT</b> | <b>Distance</b> |
|-----------|-------------|------------|------------|------------|------------|-----------------|
| 560       | 4           | 1          | 0          | 0          | 0          | 1               |
| 137       | 1           | 1          | 0          | 0          | 0          | 1               |

**BURST Group 28: No. of isolates = 2 | No. of STs = 2 | Predicted Founder = None**

| <b>ST</b> | <b>FREQ</b> | <b>SLV</b> | <b>DLV</b> | <b>TLV</b> | <b>SAT</b> | <b>Distance</b> |
|-----------|-------------|------------|------------|------------|------------|-----------------|
| 146       | 1           | 1          | 0          | 0          | 0          | 1               |
| 683       | 1           | 1          | 0          | 0          | 0          | 1               |

**BURST Group 29: No. of isolates = 3 | No. of STs = 2 | Predicted Founder = None**

| <b>ST</b> | <b>FREQ</b> | <b>SLV</b> | <b>DLV</b> | <b>TLV</b> | <b>SAT</b> | <b>Distance</b> |
|-----------|-------------|------------|------------|------------|------------|-----------------|
| 931       | 2           | 1          | 0          | 0          | 0          | 1               |
| 881       | 1           | 1          | 0          | 0          | 0          | 1               |

**BURST Group 30: No. of isolates = 3 | No. of STs = 2 | Predicted Founder = None**

| <b>ST</b> | <b>FREQ</b> | <b>SLV</b> | <b>DLV</b> | <b>TLV</b> | <b>SAT</b> | <b>Distance</b> |
|-----------|-------------|------------|------------|------------|------------|-----------------|
| 139       | 2           | 1          | 0          | 0          | 0          | 1               |
| 115       | 1           | 1          | 0          | 0          | 0          | 1               |

**BURST Group 31: No. of isolates = 2 | No. of STs = 2 | Predicted Founder = None**

| <b>ST</b> | <b>FREQ</b> | <b>SLV</b> | <b>DLV</b> | <b>TLV</b> | <b>SAT</b> | <b>Distance</b> |
|-----------|-------------|------------|------------|------------|------------|-----------------|
| 889       | 1           | 1          | 0          | 0          | 0          | 1               |
| 884       | 1           | 1          | 0          | 0          | 0          | 1               |

**Singletons: No. of isolates = 304 | No. of STs = 196**

|     |     |     |     |     |     |
|-----|-----|-----|-----|-----|-----|
| 2   | 199 | 389 | 798 | 870 | 916 |
| 5   | 200 | 395 | 800 | 871 | 918 |
| 6   | 205 | 399 | 802 | 872 | 919 |
| 7   | 207 | 451 | 807 | 874 | 922 |
| 8   | 211 | 463 | 809 | 875 | 923 |
| 10  | 212 | 494 | 821 | 876 | 925 |
| 11  | 213 | 499 | 822 | 877 | 926 |
| 12  | 215 | 508 | 825 | 878 | 927 |
| 14  | 216 | 514 | 826 | 879 | 928 |
| 15  | 218 | 532 | 827 | 880 | 930 |
| 16  | 221 | 553 | 829 | 882 | 932 |
| 27  | 222 | 554 | 830 | 885 |     |
| 41  | 224 | 555 | 831 | 887 |     |
| 110 | 225 | 557 | 832 | 888 |     |
| 114 | 231 | 564 | 836 | 890 |     |
| 116 | 233 | 571 | 837 | 892 |     |
| 117 | 234 | 609 | 838 | 893 |     |
| 128 | 242 | 611 | 840 | 894 |     |
| 132 | 244 | 612 | 841 | 895 |     |
| 136 | 259 | 620 | 842 | 897 |     |
| 143 | 260 | 633 | 844 | 898 |     |
| 144 | 262 | 645 | 846 | 899 |     |
| 145 | 270 | 647 | 849 | 900 |     |
| 147 | 273 | 649 | 850 | 901 |     |
| 161 | 275 | 685 | 851 | 902 |     |
| 164 | 277 | 701 | 852 | 903 |     |
| 166 | 282 | 708 | 853 | 904 |     |
| 167 | 296 | 776 | 854 | 905 |     |
| 168 | 299 | 777 | 855 | 906 |     |
| 169 | 303 | 778 | 856 | 907 |     |
| 170 | 308 | 779 | 857 | 908 |     |
| 172 | 316 | 782 | 860 | 909 |     |
| 173 | 347 | 788 | 863 | 910 |     |
| 179 | 348 | 789 | 865 | 911 |     |
| 189 | 377 | 794 | 867 | 912 |     |
| 191 | 381 | 796 | 868 | 913 |     |
| 195 | 386 | 797 | 869 | 915 |     |
