# Supplementary material for: Pseudomonas aeruginosa Exhibits Frequent Recombination, but Only a Limited Association between Genotype and Ecological Setting
Source: PubMed Central journal article supplement (PMC3435406; doi:10.1371/journal.pone.0044199), 2012-09-06
Supplement: pone.0044199.s004.pdf [file pone.0044199.s004.pdf]

**Figure S4. Results of eBURST analysis for the 1070 *Pseudomonas aeruginosa* sequence types listed on the *Pseudomonas aeruginosa* PubMLST database.**

*P. aeruginosa* MLST database: <http://pubmlst.org/paeruginosa/> ; Accessed 04 October 2011

Total no. of STs = 1070

No. of loci per isolate = 7 | No. of identical loci for BURST Group definition = 6

Total no. of BURST Groups detected = 145

No. of re-samplings for bootstrapping = 1000

Green coloured STs were detected in the current study only; pink coloured STs were detected in the current study and elsewhere; black coloured STs were not detected in the current study.

**BURST Group 01: No. of STs = 49 | Predicted Founder = ST-833**

| ST  | SLV | DLV | TLV | SAT | Average Distance | ST Bootstrap Group | Subgroup |
|-----|-----|-----|-----|-----|------------------|--------------------|----------|
| 833 | 8   | 15  | 10  | 15  | 2.75             | 66%                | 84%      |
| 241 | 7   | 12  | 15  | 14  | 2.83             | 24%                | 68%      |
| 653 | 7   | 11  | 11  | 19  | 3.02             | 21%                | 70%      |
| 775 | 6   | 13  | 10  | 19  | 3.02             | 7%                 | 35%      |
| 111 | 6   | 2   | 5   | 35  | 3.79             | 16%                | 87%      |
| 687 | 5   | 14  | 17  | 12  | 2.81             | 5%                 | 51%      |
| 803 | 5   | 10  | 18  | 15  | 2.97             | 9%                 | 60%      |
| 146 | 5   | 5   | 6   | 32  | 3.72             | 6%                 | 69%      |
| 247 | 4   | 14  | 11  | 19  | 3.08             | 0%                 | 0%       |
| 683 | 4   | 8   | 17  | 19  | 3.12             | 0%                 | 20%      |
| 562 | 3   | 10  | 14  | 21  | 3.16             | 0%                 | 18%      |
| 641 | 3   | 9   | 13  | 23  | 3.33             | 0%                 | 2%       |
| 471 | 3   | 8   | 17  | 20  | 3.2              | 0%                 | 6%       |
| 808 | 3   | 5   | 14  | 26  | 3.62             | 0%                 | 3%       |
| 834 | 2   | 9   | 18  | 19  | 3.41             | 0%                 | 0%       |
| 269 | 2   | 9   | 13  | 24  | 3.47             | 0%                 | 0%       |
| 686 | 2   | 7   | 19  | 20  | 3.25             | 0%                 | 0%       |
| 680 | 2   | 7   | 7   | 32  | 3.81             | 0%                 | 0%       |
| 886 | 2   | 6   | 16  | 24  | 3.5              | 0%                 | 0%       |
| 914 | 2   | 6   | 14  | 26  | 3.62             | 0%                 | 0%       |
| 772 | 2   | 6   | 6   | 34  | 3.85             | 0%                 | 0%       |
| 814 | 2   | 6   | 6   | 34  | 3.87             | 0%                 | 0%       |
| 102 | 2   | 5   | 13  | 28  | 3.64             | 0%                 | 0%       |
| 412 | 2   | 5   | 12  | 29  | 3.89             | 0%                 | 0%       |
| 509 | 2   | 5   | 12  | 29  | 3.89             | 0%                 | 0%       |
| 589 | 2   | 4   | 14  | 28  | 3.66             | 0%                 | 0%       |
| 866 | 2   | 4   | 14  | 28  | 3.66             | 0%                 | 0%       |
| 414 | 2   | 4   | 4   | 38  | 4.58             | 0%                 | 0%       |
| 232 | 2   | 2   | 16  | 28  | 3.58             | 0%                 | 0%       |
| 508 | 2   | 2   | 9   | 35  | 4.04             | 0%                 | 0%       |
| 739 | 1   | 9   | 21  | 17  | 3.2              | 0%                 | 0%       |
| 839 | 1   | 8   | 14  | 25  | 3.64             | 0%                 | 0%       |
| 934 | 1   | 7   | 16  | 24  | 3.45             | 0%                 | 0%       |
| 883 | 1   | 7   | 11  | 29  | 3.72             | 0%                 | 0%       |
| 970 | 1   | 6   | 11  | 30  | 3.66             | 0%                 | 0%       |

**BURST Group 01 (continued): No. of STs = 49 | Predicted Founder = ST-833**

| ST   | SLV | DLV | TLV | SAT | Average  | ST Bootstrap |          |
|------|-----|-----|-----|-----|----------|--------------|----------|
|      |     |     |     |     | Distance | Group        | Subgroup |
| 791  | 1   | 5   | 13  | 29  | 3.6      | 0%           | 0%       |
| 283  | 1   | 5   | 7   | 35  | 3.93     | 0%           | 0%       |
| 284  | 1   | 5   | 5   | 37  | 4.04     | 0%           | 0%       |
| 681  | 1   | 5   | 4   | 38  | 4.35     | 0%           | 0%       |
| 966  | 1   | 5   | 2   | 40  | 4.66     | 0%           | 0%       |
| 113  | 1   | 5   | 2   | 40  | 4.68     | 0%           | 0%       |
| 374  | 1   | 4   | 7   | 36  | 4.06     | 0%           | 0%       |
| 973  | 1   | 3   | 10  | 34  | 4.02     | 0%           | 0%       |
| 421  | 1   | 2   | 11  | 34  | 4.2      | 0%           | 0%       |
| 669  | 1   | 2   | 8   | 37  | 4.06     | 0%           | 0%       |
| 418  | 1   | 2   | 3   | 42  | 5.18     | 0%           | 0%       |
| 1065 | 1   | 1   | 6   | 40  | 4.54     | 0%           | 0%       |
| 937  | 1   | 1   | 5   | 41  | 4.33     | 0%           | 0%       |
| 577  | 1   | 1   | 3   | 43  | 4.27     | 0%           | 0%       |

**BURST Group 02: No. of STs = 23 | Predicted Founder = ST-17**

| ST  | SLV | DLV | TLV | SAT | Average  | ST Bootstrap |          |
|-----|-----|-----|-----|-----|----------|--------------|----------|
|     |     |     |     |     | Distance | Group        | Subgroup |
| 17  | 11  | 2   | 2   | 7   | 2.27     | 93%          | 99%      |
| 27  | 7   | 2   | 3   | 10  | 2.86     | 31%          | 91%      |
| 187 | 5   | 10  | 4   | 3   | 2.22     | 8%           | 18%      |
| 321 | 5   | 7   | 10  | 0   | 2.22     | 11%          | 29%      |
| 845 | 4   | 11  | 4   | 3   | 2.27     | 4%           | 19%      |
| 339 | 4   | 9   | 2   | 7   | 2.59     | 0%           | 4%       |
| 157 | 4   | 9   | 2   | 7   | 2.59     | 0%           | 4%       |
| 445 | 4   | 9   | 2   | 7   | 2.59     | 0%           | 4%       |
| 449 | 3   | 9   | 7   | 3   | 2.45     | 0%           | 8%       |
| 688 | 3   | 8   | 2   | 9   | 3.13     | 0%           | 0%       |
| 958 | 3   | 8   | 2   | 9   | 3.13     | 0%           | 0%       |
| 202 | 3   | 8   | 2   | 9   | 3.13     | 0%           | 0%       |
| 318 | 2   | 11  | 2   | 7   | 2.68     | 0%           | 0%       |
| 322 | 2   | 9   | 4   | 7   | 2.77     | 0%           | 0%       |
| 636 | 2   | 9   | 4   | 7   | 2.77     | 0%           | 0%       |
| 380 | 2   | 8   | 9   | 3   | 2.59     | 0%           | 0%       |
| 182 | 2   | 5   | 12  | 3   | 2.72     | 0%           | 0%       |
| 334 | 2   | 5   | 4   | 11  | 3.22     | 0%           | 0%       |
| 700 | 2   | 5   | 4   | 11  | 3.22     | 0%           | 0%       |
| 129 | 2   | 5   | 3   | 12  | 3.27     | 0%           | 0%       |
| 119 | 2   | 5   | 3   | 12  | 3.27     | 0%           | 0%       |
| 294 | 1   | 8   | 3   | 10  | 3.13     | 0%           | 0%       |
| 120 | 1   | 6   | 2   | 13  | 3.81     | 0%           | 0%       |

**BURST Group 03: No. of STs = 20 | Predicted Founder = ST-235**

| <b>ST</b> | <b>SLV</b> | <b>DLV</b> | <b>TLV</b> | <b>SAT</b> | <b>Average Distance</b> | <b>ST Bootstrap Group</b> | <b>Subgroup</b> |
|-----------|------------|------------|------------|------------|-------------------------|---------------------------|-----------------|
| 235       | 19         | 0          | 0          | 0          | 1                       | 100%                      | 100%            |
| 651       | 5          | 14         | 0          | 0          | 1.73                    | 2%                        | 18%             |
| 989       | 5          | 14         | 0          | 0          | 1.73                    | 2%                        | 19%             |
| 976       | 5          | 14         | 0          | 0          | 1.73                    | 3%                        | 19%             |
| 533       | 5          | 14         | 0          | 0          | 1.73                    | 7%                        | 18%             |
| 1015      | 5          | 14         | 0          | 0          | 1.73                    | 11%                       | 18%             |
| 696       | 3          | 16         | 0          | 0          | 1.84                    | 0%                        | 0%              |
| 141       | 3          | 16         | 0          | 0          | 1.84                    | 1%                        | 0%              |
| 745       | 3          | 16         | 0          | 0          | 1.84                    | 1%                        | 0%              |
| 323       | 3          | 16         | 0          | 0          | 1.84                    | 0%                        | 0%              |
| 304       | 3          | 16         | 0          | 0          | 1.84                    | 2%                        | 0%              |
| 622       | 3          | 16         | 0          | 0          | 1.84                    | 0%                        | 0%              |
| 457       | 3          | 16         | 0          | 0          | 1.84                    | 1%                        | 0%              |
| 593       | 3          | 16         | 0          | 0          | 1.84                    | 2%                        | 0%              |
| 230       | 3          | 16         | 0          | 0          | 1.84                    | 1%                        | 0%              |
| 534       | 3          | 16         | 0          | 0          | 1.84                    | 3%                        | 0%              |
| 824       | 3          | 16         | 0          | 0          | 1.84                    | 2%                        | 0%              |
| 342       | 3          | 16         | 0          | 0          | 1.84                    | 3%                        | 0%              |
| 660       | 2          | 17         | 0          | 0          | 1.89                    | 0%                        | 0%              |
| 227       | 2          | 17         | 0          | 0          | 1.89                    | 0%                        | 0%              |

**BURST Group 04: No. of STs = 14 | Predicted Founder = ST-244**

| <b>ST</b> | <b>SLV</b> | <b>DLV</b> | <b>TLV</b> | <b>SAT</b> | <b>Average Distance</b> | <b>ST Bootstrap Group</b> | <b>Subgroup</b> |
|-----------|------------|------------|------------|------------|-------------------------|---------------------------|-----------------|
| 244       | 10         | 3          | 0          | 0          | 1.23                    | 99%                       | 100%            |
| 441       | 5          | 7          | 1          | 0          | 1.69                    | 20%                       | 19%             |
| 766       | 5          | 7          | 1          | 0          | 1.69                    | 19%                       | 19%             |
| 595       | 4          | 8          | 1          | 0          | 1.76                    | 1%                        | 1%              |
| 594       | 4          | 8          | 1          | 0          | 1.76                    | 2%                        | 1%              |
| 336       | 2          | 9          | 2          | 0          | 2                       | 0%                        | 0%              |
| 990       | 2          | 9          | 2          | 0          | 2                       | 0%                        | 0%              |
| 630       | 2          | 9          | 2          | 0          | 2                       | 0%                        | 0%              |
| 986       | 2          | 9          | 2          | 0          | 2                       | 0%                        | 0%              |
| 597       | 2          | 9          | 2          | 0          | 2                       | 0%                        | 0%              |
| 1038      | 2          | 9          | 2          | 0          | 2                       | 0%                        | 0%              |
| 462       | 2          | 4          | 6          | 1          | 2.46                    | 0%                        | 0%              |
| 752       | 1          | 6          | 5          | 1          | 2.46                    | 0%                        | 0%              |
| 1037      | 1          | 3          | 7          | 2          | 2.76                    | 0%                        | 0%              |

**BURST Group 05: No. of STs = 12 | Predicted Founder = ST-155**

| ST   | SLV | DLV | TLV | SAT | Average  | ST Bootstrap |          |
|------|-----|-----|-----|-----|----------|--------------|----------|
|      |     |     |     |     | Distance | Group        | Subgroup |
| 155  | 11  | 0   | 0   | 0   | 1        | 100%         | 100%     |
| 461  | 4   | 7   | 0   | 0   | 1.63     | 5%           | 10%      |
| 280  | 4   | 7   | 0   | 0   | 1.63     | 4%           | 10%      |
| 579  | 4   | 7   | 0   | 0   | 1.63     | 9%           | 9%       |
| 13   | 4   | 7   | 0   | 0   | 1.63     | 15%          | 10%      |
| 786  | 2   | 9   | 0   | 0   | 1.81     | 0%           | 0%       |
| 210  | 2   | 9   | 0   | 0   | 1.81     | 0%           | 0%       |
| 677  | 1   | 10  | 0   | 0   | 1.9      | 0%           | 0%       |
| 250  | 1   | 10  | 0   | 0   | 1.9      | 0%           | 0%       |
| 541  | 1   | 10  | 0   | 0   | 1.9      | 0%           | 0%       |
| 811  | 1   | 10  | 0   | 0   | 1.9      | 0%           | 0%       |
| 1010 | 1   | 10  | 0   | 0   | 1.9      | 0%           | 0%       |

**BURST Group 06: No. of STs = 12 | Predicted Founder = ST-252**

| ST  | SLV | DLV | TLV | SAT | Average  | ST Bootstrap |          |
|-----|-----|-----|-----|-----|----------|--------------|----------|
|     |     |     |     |     | Distance | Group        | Subgroup |
| 252 | 8   | 3   | 0   | 0   | 1.27     | 97%          | 97%      |
| 9   | 5   | 5   | 1   | 0   | 1.63     | 34%          | 44%      |
| 495 | 3   | 7   | 1   | 0   | 1.81     | 0%           | 0%       |
| 702 | 3   | 7   | 1   | 0   | 1.81     | 1%           | 0%       |
| 498 | 3   | 5   | 3   | 0   | 2        | 1%           | 0%       |
| 924 | 3   | 5   | 3   | 0   | 2        | 2%           | 0%       |
| 420 | 3   | 5   | 3   | 0   | 2        | 5%           | 0%       |
| 411 | 2   | 7   | 2   | 0   | 2        | 0%           | 0%       |
| 984 | 1   | 8   | 2   | 0   | 2.09     | 0%           | 0%       |
| 163 | 1   | 5   | 4   | 1   | 2.45     | 0%           | 0%       |
| 118 | 1   | 4   | 5   | 1   | 2.54     | 0%           | 0%       |
| 429 | 1   | 1   | 7   | 2   | 2.9      | 0%           | 0%       |

**BURST Group 07: No. of STs = 9 | Predicted Founder = ST-274**

| ST   | SLV | DLV | TLV | SAT | Average  | ST Bootstrap |          |
|------|-----|-----|-----|-----|----------|--------------|----------|
|      |     |     |     |     | Distance | Group        | Subgroup |
| 274  | 8   | 0   | 0   | 0   | 1        | 100%         | 99%      |
| 466  | 3   | 5   | 0   | 0   | 1.62     | 3%           | 0%       |
| 276  | 3   | 5   | 0   | 0   | 1.62     | 3%           | 0%       |
| 209  | 3   | 5   | 0   | 0   | 1.62     | 9%           | 0%       |
| 936  | 1   | 7   | 0   | 0   | 1.87     | 0%           | 0%       |
| 268  | 1   | 7   | 0   | 0   | 1.87     | 0%           | 0%       |
| 546  | 1   | 7   | 0   | 0   | 1.87     | 0%           | 0%       |
| 1068 | 1   | 7   | 0   | 0   | 1.87     | 0%           | 0%       |
| 1043 | 1   | 7   | 0   | 0   | 1.87     | 0%           | 0%       |

**BURST Group 08: No. of STs = 8 | Predicted Founder = ST-395**

| ST  | SLV | DLV | TLV | SAT | Average  | ST Bootstrap |          |
|-----|-----|-----|-----|-----|----------|--------------|----------|
|     |     |     |     |     | Distance | Group        | Subgroup |
| 395 | 7   | 0   | 0   | 0   | 1        | 99%          | 99%      |
| 661 | 3   | 4   | 0   | 0   | 1.57     | 3%           | 0%       |
| 112 | 3   | 4   | 0   | 0   | 1.57     | 3%           | 0%       |
| 407 | 3   | 4   | 0   | 0   | 1.57     | 6%           | 0%       |
| 618 | 2   | 5   | 0   | 0   | 1.71     | 0%           | 0%       |
| 442 | 2   | 5   | 0   | 0   | 1.71     | 0%           | 0%       |
| 632 | 1   | 6   | 0   | 0   | 1.85     | 0%           | 0%       |
| 625 | 1   | 6   | 0   | 0   | 1.85     | 0%           | 0%       |

**BURST Group 09: No. of STs = 8 | Predicted Founder = ST-179**

| ST  | SLV | DLV | TLV | SAT | Average  | ST Bootstrap |          |
|-----|-----|-----|-----|-----|----------|--------------|----------|
|     |     |     |     |     | Distance | Group        | Subgroup |
| 179 | 5   | 2   | 0   | 0   | 1.28     | 90%          | 77%      |
| 180 | 3   | 3   | 1   | 0   | 1.71     | 17%          | 11%      |
| 156 | 3   | 3   | 1   | 0   | 1.71     | 21%          | 8%       |
| 158 | 2   | 4   | 1   | 0   | 1.85     | 0%           | 0%       |
| 353 | 2   | 4   | 1   | 0   | 1.85     | 0%           | 0%       |
| 178 | 1   | 5   | 1   | 0   | 2        | 0%           | 0%       |
| 188 | 1   | 3   | 2   | 1   | 2.42     | 0%           | 0%       |
| 747 | 1   | 2   | 3   | 1   | 2.57     | 0%           | 0%       |

**BURST Group 10: No. of STs = 8 | Predicted Founder = ST-175**

| ST  | SLV | DLV | TLV | SAT | Average  | ST Bootstrap |          |
|-----|-----|-----|-----|-----|----------|--------------|----------|
|     |     |     |     |     | Distance | Group        | Subgroup |
| 175 | 7   | 0   | 0   | 0   | 1        | 99%          | 98%      |
| 619 | 2   | 5   | 0   | 0   | 1.71     | 0%           | 0%       |
| 171 | 2   | 5   | 0   | 0   | 1.71     | 0%           | 0%       |
| 951 | 2   | 5   | 0   | 0   | 1.71     | 0%           | 0%       |
| 159 | 2   | 5   | 0   | 0   | 1.71     | 0%           | 0%       |
| 101 | 2   | 5   | 0   | 0   | 1.71     | 0%           | 0%       |
| 201 | 2   | 5   | 0   | 0   | 1.71     | 0%           | 0%       |
| 228 | 1   | 6   | 0   | 0   | 1.85     | 0%           | 0%       |

**BURST Group 11: No. of STs = 8 | Predicted Founder = ST-406**

| ST  | SLV | DLV | TLV | SAT | Average  | ST Bootstrap |          |
|-----|-----|-----|-----|-----|----------|--------------|----------|
|     |     |     |     |     | Distance | Group        | Subgroup |
| 406 | 7   | 0   | 0   | 0   | 1        | 97%          | 98%      |
| 484 | 4   | 3   | 0   | 0   | 1.42     | 9%           | 11%      |
| 405 | 4   | 3   | 0   | 0   | 1.42     | 5%           | 12%      |
| 536 | 4   | 3   | 0   | 0   | 1.42     | 9%           | 13%      |
| 523 | 4   | 3   | 0   | 0   | 1.42     | 14%          | 11%      |
| 489 | 2   | 5   | 0   | 0   | 1.71     | 0%           | 0%       |
| 547 | 2   | 5   | 0   | 0   | 1.71     | 0%           | 0%       |
| 608 | 1   | 6   | 0   | 0   | 1.85     | 0%           | 0%       |

**BURST Group 12: No. of STs = 8 | Predicted Founder = ST-835**

| ST   | SLV | DLV | TLV | SAT | Average  | ST Bootstrap |          |
|------|-----|-----|-----|-----|----------|--------------|----------|
|      |     |     |     |     | Distance | Group        | Subgroup |
| 835  | 3   | 3   | 1   | 0   | 1.71     | 36%          | 19%      |
| 731  | 3   | 2   | 1   | 1   | 2        | 29%          | 18%      |
| 1052 | 3   | 2   | 1   | 1   | 2        | 32%          | 21%      |
| 891  | 2   | 3   | 2   | 0   | 2        | 10%          | 0%       |
| 272  | 2   | 1   | 2   | 2   | 2.57     | 13%          | 0%       |
| 932  | 1   | 3   | 1   | 2   | 2.71     | 0%           | 0%       |
| 838  | 1   | 3   | 1   | 2   | 2.71     | 0%           | 0%       |
| 384  | 1   | 1   | 1   | 4   | 3.42     | 0%           | 0%       |

**BURST Group 13: No. of STs = 7 | Predicted Founder = ST-560**

| ST   | SLV | DLV | TLV | SAT | Average  | ST Bootstrap |          |
|------|-----|-----|-----|-----|----------|--------------|----------|
|      |     |     |     |     | Distance | Group        | Subgroup |
| 560  | 6   | 0   | 0   | 0   | 1        | 97%          | 92%      |
| 332  | 3   | 3   | 0   | 0   | 1.5      | 4%           | 1%       |
| 137  | 3   | 3   | 0   | 0   | 1.5      | 6%           | 1%       |
| 340  | 3   | 3   | 0   | 0   | 1.5      | 10%          | 1%       |
| 729  | 2   | 4   | 0   | 0   | 1.66     | 0%           | 0%       |
| 1056 | 2   | 4   | 0   | 0   | 1.66     | 0%           | 0%       |
| 671  | 1   | 5   | 0   | 0   | 1.83     | 0%           | 0%       |

**BURST Group 14: No. of STs = 7 | Predicted Founder = ST-253**

| ST  | SLV | DLV | TLV | SAT | Average  | ST Bootstrap |          |
|-----|-----|-----|-----|-----|----------|--------------|----------|
|     |     |     |     |     | Distance | Group        | Subgroup |
| 253 | 4   | 2   | 0   | 0   | 1.33     | 73%          | 52%      |
| 540 | 3   | 3   | 0   | 0   | 1.5      | 40%          | 21%      |
| 317 | 1   | 3   | 2   | 0   | 2.16     | 0%           | 0%       |
| 109 | 1   | 3   | 2   | 0   | 2.16     | 0%           | 0%       |
| 828 | 1   | 3   | 2   | 0   | 2.16     | 0%           | 0%       |
| 692 | 1   | 2   | 3   | 0   | 2.33     | 0%           | 0%       |
| 551 | 1   | 2   | 3   | 0   | 2.33     | 0%           | 0%       |

**BURST Group 15: No. of STs = 7 | Predicted Founder = ST-148**

| ST  | SLV | DLV | TLV | SAT | Average  | ST Bootstrap |          |
|-----|-----|-----|-----|-----|----------|--------------|----------|
|     |     |     |     |     | Distance | Group        | Subgroup |
| 148 | 6   | 0   | 0   | 0   | 1        | 99%          | 95%      |
| 956 | 2   | 4   | 0   | 0   | 1.66     | 0%           | 0%       |
| 140 | 2   | 4   | 0   | 0   | 1.66     | 0%           | 0%       |
| 568 | 2   | 4   | 0   | 0   | 1.66     | 0%           | 0%       |
| 371 | 2   | 4   | 0   | 0   | 1.66     | 0%           | 0%       |
| 682 | 1   | 5   | 0   | 0   | 1.83     | 0%           | 0%       |
| 952 | 1   | 5   | 0   | 0   | 1.83     | 0%           | 0%       |

**BURST Group 16:No. of STs = 6 | Predicted Founder = ST-132**

| ST  | SLV | DLV | TLV | SAT | Average Distance | ST Bootstrap Group | Subgroup |
|-----|-----|-----|-----|-----|------------------|--------------------|----------|
| 132 | 5   | 0   | 0   | 0   | 1                | 97%                | 81%      |
| 329 | 2   | 3   | 0   | 0   | 1.6              | 0%                 | 0%       |
| 607 | 2   | 3   | 0   | 0   | 1.6              | 0%                 | 0%       |
| 665 | 1   | 4   | 0   | 0   | 1.8              | 0%                 | 0%       |
| 615 | 1   | 4   | 0   | 0   | 1.8              | 0%                 | 0%       |
| 505 | 1   | 4   | 0   | 0   | 1.8              | 0%                 | 0%       |

**BURST Group 17: No. of STs = 6 | Predicted Founder = ST-309**

| ST   | SLV | DLV | TLV | SAT | Average Distance | ST Bootstrap Group | Subgroup |
|------|-----|-----|-----|-----|------------------|--------------------|----------|
| 309  | 5   | 0   | 0   | 0   | 1                | 96%                | 82%      |
| 311  | 2   | 3   | 0   | 0   | 1.6              | 0%                 | 0%       |
| 658  | 2   | 3   | 0   | 0   | 1.6              | 0%                 | 0%       |
| 458  | 2   | 3   | 0   | 0   | 1.6              | 0%                 | 0%       |
| 1017 | 2   | 3   | 0   | 0   | 1.6              | 1%                 | 0%       |
| 223  | 1   | 4   | 0   | 0   | 1.8              | 0%                 | 0%       |

**BURST Group 18:No. of STs = 6 | Predicted Founder = ST-308**

| ST   | SLV | DLV | TLV | SAT | Average Distance | ST Bootstrap Group | Subgroup |
|------|-----|-----|-----|-----|------------------|--------------------|----------|
| 308  | 5   | 0   | 0   | 0   | 1                | 90%                | 84%      |
| 628  | 3   | 2   | 0   | 0   | 1.4              | 6%                 | 5%       |
| 1004 | 3   | 2   | 0   | 0   | 1.4              | 6%                 | 6%       |
| 345  | 3   | 2   | 0   | 0   | 1.4              | 11%                | 6%       |
| 978  | 1   | 4   | 0   | 0   | 1.8              | 0%                 | 0%       |
| 481  | 1   | 4   | 0   | 0   | 1.8              | 0%                 | 0%       |

**BURST Group 19:No. of STs = 6 | Predicted Founder = ST-399**

| ST  | SLV | DLV | TLV | SAT | Average Distance | ST Bootstrap Group | Subgroup |
|-----|-----|-----|-----|-----|------------------|--------------------|----------|
| 399 | 4   | 1   | 0   | 0   | 1.2              | 73%                | 49%      |
| 656 | 3   | 2   | 0   | 0   | 1.4              | 36%                | 16%      |
| 398 | 2   | 3   | 0   | 0   | 1.6              | 0%                 | 0%       |
| 401 | 1   | 3   | 1   | 0   | 2                | 0%                 | 0%       |
| 400 | 1   | 3   | 1   | 0   | 2                | 0%                 | 0%       |
| 668 | 1   | 2   | 2   | 0   | 2.2              | 0%                 | 0%       |

**BURST Group 20:No. of STs = 6 | Predicted Founder = ST-1058**

| ST   | SLV | DLV | TLV | SAT | Average Distance | ST Bootstrap Group | Subgroup |
|------|-----|-----|-----|-----|------------------|--------------------|----------|
| 1058 | 4   | 1   | 0   | 0   | 1.2              | 70%                | 53%      |
| 258  | 3   | 2   | 0   | 0   | 1.4              | 38%                | 16%      |
| 626  | 2   | 3   | 0   | 0   | 1.6              | 1%                 | 0%       |
| 734  | 2   | 2   | 1   | 0   | 1.8              | 1%                 | 0%       |
| 1055 | 2   | 2   | 1   | 0   | 1.8              | 0%                 | 0%       |
| 167  | 1   | 2   | 2   | 0   | 2.2              | 0%                 | 0%       |

**BURST Group 21:No. of STs = 5 | Predicted Founder = ST-620**

| ST  | SLV | DLV | TLV | SAT | Average  | ST Bootstrap |          |
|-----|-----|-----|-----|-----|----------|--------------|----------|
|     |     |     |     |     | Distance | Group        | Subgroup |
| 620 | 4   | 0   | 0   | 0   | 1        | 67%          | 50%      |
| 338 | 3   | 1   | 0   | 0   | 1.25     | 8%           | 11%      |
| 320 | 3   | 1   | 0   | 0   | 1.25     | 12%          | 10%      |
| 753 | 3   | 1   | 0   | 0   | 1.25     | 23%          | 10%      |
| 520 | 1   | 3   | 0   | 0   | 1.75     | 0%           | 0%       |

**BURST Group 22:No. of STs = 5 | Predicted Founder = ST-298**

| ST  | SLV | DLV | TLV | SAT | Average  | ST Bootstrap |          |
|-----|-----|-----|-----|-----|----------|--------------|----------|
|     |     |     |     |     | Distance | Group        | Subgroup |
| 298 | 3   | 1   | 0   | 0   | 1.25     | 61%          | 16%      |
| 446 | 2   | 2   | 0   | 0   | 1.5      | 17%          | 0%       |
| 691 | 1   | 2   | 1   | 0   | 2        | 0%           | 0%       |
| 539 | 1   | 2   | 1   | 0   | 2        | 0%           | 0%       |
| 650 | 1   | 1   | 2   | 0   | 2.25     | 0%           | 0%       |

**BURST Group 23:No. of STs = 5 | Predicted Founder = ST-170**

| ST  | SLV | DLV | TLV | SAT | Average  | ST Bootstrap |          |
|-----|-----|-----|-----|-----|----------|--------------|----------|
|     |     |     |     |     | Distance | Group        | Subgroup |
| 170 | 3   | 1   | 0   | 0   | 1.25     | 60%          | 17%      |
| 367 | 2   | 2   | 0   | 0   | 1.5      | 17%          | 0%       |
| 652 | 1   | 2   | 1   | 0   | 2        | 0%           | 0%       |
| 997 | 1   | 2   | 1   | 0   | 2        | 0%           | 0%       |
| 373 | 1   | 1   | 2   | 0   | 2.25     | 0%           | 0%       |

**BURST Group 24:No. of STs = 5 | Predicted Founder = ST-387**

| ST  | SLV | DLV | TLV | SAT | Average  | ST Bootstrap |          |
|-----|-----|-----|-----|-----|----------|--------------|----------|
|     |     |     |     |     | Distance | Group        | Subgroup |
| 387 | 3   | 1   | 0   | 0   | 1.25     | 62%          | 16%      |
| 181 | 2   | 2   | 0   | 0   | 1.5      | 19%          | 0%       |
| 403 | 1   | 3   | 0   | 0   | 1.75     | 0%           | 0%       |
| 980 | 1   | 2   | 1   | 0   | 2        | 0%           | 0%       |
| 730 | 1   | 2   | 1   | 0   | 2        | 0%           | 0%       |

**BURST Group 25:No. of STs = 5 | Predicted Founder = ST-282**

| ST  | SLV | DLV | TLV | SAT | Average  | ST Bootstrap |          |
|-----|-----|-----|-----|-----|----------|--------------|----------|
|     |     |     |     |     | Distance | Group        | Subgroup |
| 282 | 4   | 0   | 0   | 0   | 1        | 89%          | 52%      |
| 444 | 2   | 2   | 0   | 0   | 1.5      | 1%           | 0%       |
| 278 | 2   | 2   | 0   | 0   | 1.5      | 2%           | 0%       |
| 959 | 1   | 3   | 0   | 0   | 1.75     | 0%           | 0%       |
| 410 | 1   | 3   | 0   | 0   | 1.75     | 0%           | 0%       |



**BURST Group 26:No. of STs = 5 | Predicted Founder = Multiple**

| ST  | SLV | DLV | TLV | SAT | Average  | ST Bootstrap |          |
|-----|-----|-----|-----|-----|----------|--------------|----------|
|     |     |     |     |     | Distance | Group        | Subgroup |
| 153 | 2   | 2   | 0   | 0   | 1.5      | 26%          | 0%       |
| 219 | 2   | 2   | 0   | 0   | 1.5      | 20%          | 0%       |
| 887 | 2   | 1   | 1   | 0   | 1.75     | 22%          | 0%       |
| 583 | 1   | 2   | 1   | 0   | 2        | 0%           | 0%       |
| 41  | 1   | 1   | 2   | 0   | 2.25     | 0%           | 0%       |

**BURST Group 27:No. of STs = 5 | Predicted Founder = ST-245**

| ST  | SLV | DLV | TLV | SAT | Average  | ST Bootstrap |          |
|-----|-----|-----|-----|-----|----------|--------------|----------|
|     |     |     |     |     | Distance | Group        | Subgroup |
| 245 | 4   | 0   | 0   | 0   | 1        | 79%          | 46%      |
| 142 | 2   | 2   | 0   | 0   | 1.5      | 1%           | 0%       |
| 740 | 2   | 2   | 0   | 0   | 1.5      | 3%           | 0%       |
| 580 | 2   | 2   | 0   | 0   | 1.5      | 2%           | 0%       |
| 561 | 2   | 2   | 0   | 0   | 1.5      | 5%           | 0%       |

**BURST Group 28:No. of STs = 5 | Predicted Founder = ST-514**

| ST  | SLV | DLV | TLV | SAT | Average  | ST Bootstrap |          |
|-----|-----|-----|-----|-----|----------|--------------|----------|
|     |     |     |     |     | Distance | Group        | Subgroup |
| 514 | 3   | 1   | 0   | 0   | 1.25     | 60%          | 14%      |
| 482 | 2   | 2   | 0   | 0   | 1.5      | 19%          | 0%       |
| 133 | 1   | 2   | 1   | 0   | 2        | 0%           | 0%       |
| 556 | 1   | 2   | 1   | 0   | 2        | 0%           | 0%       |
| 513 | 1   | 1   | 2   | 0   | 2.25     | 0%           | 0%       |

**BURST Group 29:No. of STs = 4 | Predicted Founder = ST-313**

| ST  | SLV | DLV | TLV | SAT | Average  | ST Bootstrap |          |
|-----|-----|-----|-----|-----|----------|--------------|----------|
|     |     |     |     |     | Distance | Group        | Subgroup |
| 313 | 3   | 0   | 0   | 0   | 1        | 73%          | 14%      |
| 678 | 1   | 2   | 0   | 0   | 1.66     | 0%           | 0%       |
| 648 | 1   | 2   | 0   | 0   | 1.66     | 0%           | 0%       |
| 174 | 1   | 2   | 0   | 0   | 1.66     | 0%           | 0%       |

**BURST Group 30:No. of STs = 4 | Predicted Founder = ST-277**

| ST  | SLV | DLV | TLV | SAT | Average  | ST Bootstrap |          |
|-----|-----|-----|-----|-----|----------|--------------|----------|
|     |     |     |     |     | Distance | Group        | Subgroup |
| 277 | 3   | 0   | 0   | 0   | 1        | 61%          | 13%      |
| 659 | 2   | 1   | 0   | 0   | 1.33     | 5%           | 0%       |
| 758 | 2   | 1   | 0   | 0   | 1.33     | 11%          | 0%       |
| 364 | 1   | 2   | 0   | 0   | 1.66     | 0%           | 0%       |

**BURST Group 31:No. of STs = 4 | Predicted Founder = ST-1025**

| ST   | SLV | DLV | TLV | SAT | Average  | ST Bootstrap |          |
|------|-----|-----|-----|-----|----------|--------------|----------|
|      |     |     |     |     | Distance | Group        | Subgroup |
| 1025 | 3   | 0   | 0   | 0   | 1        | 60%          | 13%      |
| 645  | 2   | 1   | 0   | 0   | 1.33     | 6%           | 0%       |
| 256  | 2   | 1   | 0   | 0   | 1.33     | 10%          | 0%       |
| 968  | 1   | 2   | 0   | 0   | 1.66     | 0%           | 0%       |

**BURST Group 32:No. of STs = 4 | Predicted Founder = ST-233**

| ST  | SLV | DLV | TLV | SAT | Average  | ST Bootstrap |          |
|-----|-----|-----|-----|-----|----------|--------------|----------|
|     |     |     |     |     | Distance | Group        | Subgroup |
| 233 | 3   | 0   | 0   | 0   | 1        | 75%          | 13%      |
| 629 | 1   | 2   | 0   | 0   | 1.66     | 0%           | 0%       |
| 743 | 1   | 2   | 0   | 0   | 1.66     | 0%           | 0%       |
| 742 | 1   | 2   | 0   | 0   | 1.66     | 0%           | 0%       |

**BURST Group 33:No. of STs = 4 | Predicted Founder = ST-152**

| ST  | SLV | DLV | TLV | SAT | Average  | ST Bootstrap |          |
|-----|-----|-----|-----|-----|----------|--------------|----------|
|     |     |     |     |     | Distance | Group        | Subgroup |
| 152 | 3   | 0   | 0   | 0   | 1        | 74%          | 12%      |
| 185 | 1   | 2   | 0   | 0   | 1.66     | 0%           | 0%       |
| 953 | 1   | 2   | 0   | 0   | 1.66     | 0%           | 0%       |
| 749 | 1   | 2   | 0   | 0   | 1.66     | 0%           | 0%       |

**BURST Group 34:No. of STs = 4 | Predicted Founder = ST-497**

| ST  | SLV | DLV | TLV | SAT | Average  | ST Bootstrap |          |
|-----|-----|-----|-----|-----|----------|--------------|----------|
|     |     |     |     |     | Distance | Group        | Subgroup |
| 497 | 3   | 0   | 0   | 0   | 1        | 58%          | 13%      |
| 602 | 2   | 1   | 0   | 0   | 1.33     | 5%           | 0%       |
| 576 | 2   | 1   | 0   | 0   | 1.33     | 12%          | 0%       |
| 544 | 1   | 2   | 0   | 0   | 1.66     | 0%           | 0%       |

**BURST Group 35:No. of STs = 4 | Predicted Founder = ST-217**

| ST  | SLV | DLV | TLV | SAT | Average  | ST Bootstrap |          |
|-----|-----|-----|-----|-----|----------|--------------|----------|
|     |     |     |     |     | Distance | Group        | Subgroup |
| 217 | 3   | 0   | 0   | 0   | 1        | 71%          | 11%      |
| 950 | 1   | 2   | 0   | 0   | 1.66     | 0%           | 0%       |
| 417 | 1   | 2   | 0   | 0   | 1.66     | 0%           | 0%       |
| 14  | 1   | 2   | 0   | 0   | 1.66     | 0%           | 0%       |

**BURST Group 36:No. of STs = 4 | Predicted Founder = ST-571**

| ST   | SLV | DLV | TLV | SAT | Average  | ST Bootstrap |          |
|------|-----|-----|-----|-----|----------|--------------|----------|
|      |     |     |     |     | Distance | Group        | Subgroup |
| 571  | 2   | 1   | 0   | 0   | 1.33     | 29%          | 0%       |
| 1012 | 2   | 1   | 0   | 0   | 1.33     | 25%          | 0%       |
| 938  | 1   | 1   | 1   | 0   | 2        | 0%           | 0%       |
| 1013 | 1   | 1   | 1   | 0   | 2        | 0%           | 0%       |

**BURST Group 37:No. of STs = 4 | Predicted Founder = ST-385**

| ST   | SLV | DLV | TLV | SAT | Average  | ST Bootstrap |          |
|------|-----|-----|-----|-----|----------|--------------|----------|
|      |     |     |     |     | Distance | Group        | Subgroup |
| 385  | 3   | 0   | 0   | 0   | 1        | 58%          | 14%      |
| 920  | 2   | 1   | 0   | 0   | 1.33     | 3%           | 0%       |
| 1036 | 2   | 1   | 0   | 0   | 1.33     | 12%          | 0%       |
| 443  | 1   | 2   | 0   | 0   | 1.66     | 0%           | 0%       |

**BURST Group 38:No. of STs = 4 | Predicted Founder = ST-569**

| ST  | SLV | DLV | TLV | SAT | Average  | ST Bootstrap |          |
|-----|-----|-----|-----|-----|----------|--------------|----------|
|     |     |     |     |     | Distance | Group        | Subgroup |
| 569 | 3   | 0   | 0   | 0   | 1        | 73%          | 12%      |
| 432 | 1   | 2   | 0   | 0   | 1.66     | 0%           | 0%       |
| 529 | 1   | 2   | 0   | 0   | 1.66     | 0%           | 0%       |
| 848 | 1   | 2   | 0   | 0   | 1.66     | 0%           | 0%       |

**BURST Group 39:No. of STs = 4 | Predicted Founder = ST-782**

| ST  | SLV | DLV | TLV | SAT | Average  | ST Bootstrap |          |
|-----|-----|-----|-----|-----|----------|--------------|----------|
|     |     |     |     |     | Distance | Group        | Subgroup |
| 782 | 3   | 0   | 0   | 0   | 1        | 73%          | 12%      |
| 785 | 1   | 2   | 0   | 0   | 1.66     | 0%           | 0%       |
| 784 | 1   | 2   | 0   | 0   | 1.66     | 0%           | 0%       |
| 783 | 1   | 2   | 0   | 0   | 1.66     | 0%           | 0%       |

**BURST Group 40:No. of STs = 4 | Predicted Founder = ST-238**

| ST   | SLV | DLV | TLV | SAT | Average  | ST Bootstrap |          |
|------|-----|-----|-----|-----|----------|--------------|----------|
|      |     |     |     |     | Distance | Group        | Subgroup |
| 238  | 3   | 0   | 0   | 0   | 1        | 58%          | 12%      |
| 243  | 2   | 1   | 0   | 0   | 1.33     | 5%           | 0%       |
| 237  | 2   | 1   | 0   | 0   | 1.33     | 11%          | 0%       |
| 1001 | 1   | 2   | 0   | 0   | 1.66     | 0%           | 0%       |

**BURST Group 41:No. of STs = 4 | Predicted Founder = ST-598**

| ST  | SLV | DLV | TLV | SAT | Average  | ST Bootstrap |          |
|-----|-----|-----|-----|-----|----------|--------------|----------|
|     |     |     |     |     | Distance | Group        | Subgroup |
| 598 | 3   | 0   | 0   | 0   | 1        | 59%          | 15%      |
| 896 | 2   | 1   | 0   | 0   | 1.33     | 4%           | 0%       |
| 847 | 2   | 1   | 0   | 0   | 1.33     | 10%          | 0%       |
| 226 | 1   | 2   | 0   | 0   | 1.66     | 0%           | 0%       |

**BURST Group 42:No. of STs = 4 | Predicted Founder = ST-360**

| ST  | SLV | DLV | TLV | SAT | Average  | ST Bootstrap |          |
|-----|-----|-----|-----|-----|----------|--------------|----------|
|     |     |     |     |     | Distance | Group        | Subgroup |
| 360 | 2   | 1   | 0   | 0   | 1.33     | 26%          | 0%       |
| 861 | 2   | 1   | 0   | 0   | 1.33     | 29%          | 0%       |
| 864 | 1   | 1   | 1   | 0   | 2        | 0%           | 0%       |
| 862 | 1   | 1   | 1   | 0   | 2        | 0%           | 0%       |

**BURST Group 43:No. of STs = 3 | Predicted Founder = ST-699**

| ST  | SLV | DLV | TLV | SAT | Average  | ST Bootstrap |          |
|-----|-----|-----|-----|-----|----------|--------------|----------|
|     |     |     |     |     | Distance | Group        | Subgroup |
| 699 | 2   | 0   | 0   | 0   | 1        | 33%          | 0%       |
| 944 | 1   | 1   | 0   | 0   | 1.5      | 0%           | 0%       |
| 549 | 1   | 1   | 0   | 0   | 1.5      | 0%           | 0%       |

**BURST Group 44:No. of STs = 3 | Predicted Founder = ST-273**

| ST  | SLV | DLV | TLV | SAT | Average  | ST Bootstrap |          |
|-----|-----|-----|-----|-----|----------|--------------|----------|
|     |     |     |     |     | Distance | Group        | Subgroup |
| 273 | 2   | 0   | 0   | 0   | 1        | 31%          | 0%       |
| 695 | 1   | 1   | 0   | 0   | 1.5      | 0%           | 0%       |
| 510 | 1   | 1   | 0   | 0   | 1.5      | 0%           | 0%       |

**BURST Group 45:No. of STs = 3 | Predicted Founder = ST-348**

| ST  | SLV | DLV | TLV | SAT | Average  | ST Bootstrap |          |
|-----|-----|-----|-----|-----|----------|--------------|----------|
|     |     |     |     |     | Distance | Group        | Subgroup |
| 348 | 2   | 0   | 0   | 0   | 1        | 33%          | 0%       |
| 331 | 1   | 1   | 0   | 0   | 1.5      | 0%           | 0%       |
| 416 | 1   | 1   | 0   | 0   | 1.5      | 0%           | 0%       |

**BURST Group 46:No. of STs = 3 | Predicted Founder = ST-676**

| ST  | SLV | DLV | TLV | SAT | Average  | ST Bootstrap |          |
|-----|-----|-----|-----|-----|----------|--------------|----------|
|     |     |     |     |     | Distance | Group        | Subgroup |
| 676 | 2   | 0   | 0   | 0   | 1        | 33%          | 0%       |
| 128 | 1   | 1   | 0   | 0   | 1.5      | 0%           | 0%       |
| 450 | 1   | 1   | 0   | 0   | 1.5      | 0%           | 0%       |

**BURST Group 47:No. of STs = 3 | Predicted Founder = ST-667**

| ST  | SLV | DLV | TLV | SAT | Average  | ST Bootstrap |          |
|-----|-----|-----|-----|-----|----------|--------------|----------|
|     |     |     |     |     | Distance | Group        | Subgroup |
| 667 | 2   | 0   | 0   | 0   | 1        | 32%          | 0%       |
| 468 | 1   | 1   | 0   | 0   | 1.5      | 0%           | 0%       |
| 502 | 1   | 1   | 0   | 0   | 1.5      | 0%           | 0%       |

**BURST Group 48:No. of STs = 3 | Predicted Founder = ST-254**

| ST   | SLV | DLV | TLV | SAT | Average  | ST Bootstrap |          |
|------|-----|-----|-----|-----|----------|--------------|----------|
|      |     |     |     |     | Distance | Group        | Subgroup |
| 254  | 2   | 0   | 0   | 0   | 1        | 31%          | 0%       |
| 666  | 1   | 1   | 0   | 0   | 1.5      | 0%           | 0%       |
| 1041 | 1   | 1   | 0   | 0   | 1.5      | 0%           | 0%       |

**BURST Group 49:No. of STs = 3 | Predicted Founder = ST-709**

| ST  | SLV | DLV | TLV | SAT | Average  | ST Bootstrap |          |
|-----|-----|-----|-----|-----|----------|--------------|----------|
|     |     |     |     |     | Distance | Group        | Subgroup |
| 709 | 2   | 0   | 0   | 0   | 1        | 31%          | 0%       |
| 655 | 1   | 1   | 0   | 0   | 1.5      | 0%           | 0%       |
| 738 | 1   | 1   | 0   | 0   | 1.5      | 0%           | 0%       |

**BURST Group 50:No. of STs = 3 | Predicted Founder = ST-964**

| ST  | SLV | DLV | TLV | SAT | Average  | ST Bootstrap |          |
|-----|-----|-----|-----|-----|----------|--------------|----------|
|     |     |     |     |     | Distance | Group        | Subgroup |
| 964 | 2   | 0   | 0   | 0   | 1        | 31%          | 0%       |
| 654 | 1   | 1   | 0   | 0   | 1.5      | 0%           | 0%       |
| 741 | 1   | 1   | 0   | 0   | 1.5      | 0%           | 0%       |

**BURST Group 51:No. of STs = 3 | Predicted Founder = Multiple**

| ST  | SLV | DLV | TLV | SAT | Average  | ST Bootstrap |          |
|-----|-----|-----|-----|-----|----------|--------------|----------|
|     |     |     |     |     | Distance | Group        | Subgroup |
| 638 | 2   | 0   | 0   | 0   | 1        | 6%           | 0%       |
| 797 | 2   | 0   | 0   | 0   | 1        | 8%           | 0%       |
| 378 | 2   | 0   | 0   | 0   | 1        | 18%          | 0%       |

**BURST Group 52:No. of STs = 3 | Predicted Founder = ST-242**

| ST  | SLV | DLV | TLV | SAT | Average  | ST Bootstrap |          |
|-----|-----|-----|-----|-----|----------|--------------|----------|
|     |     |     |     |     | Distance | Group        | Subgroup |
| 242 | 2   | 0   | 0   | 0   | 1        | 31%          | 0%       |
| 996 | 1   | 1   | 0   | 0   | 1.5      | 0%           | 0%       |
| 456 | 1   | 1   | 0   | 0   | 1.5      | 0%           | 0%       |

**BURST Group 53:No. of STs = 3 | Predicted Founder = ST-195**

| ST  | SLV | DLV | TLV | SAT | Average  | ST Bootstrap |          |
|-----|-----|-----|-----|-----|----------|--------------|----------|
|     |     |     |     |     | Distance | Group        | Subgroup |
| 195 | 2   | 0   | 0   | 0   | 1        | 29%          | 0%       |
| 977 | 1   | 1   | 0   | 0   | 1.5      | 0%           | 0%       |
| 349 | 1   | 1   | 0   | 0   | 1.5      | 0%           | 0%       |

**BURST Group 54:No. of STs = 3 | Predicted Founder = ST-164**

| ST  | SLV | DLV | TLV | SAT | Average  | ST Bootstrap |          |
|-----|-----|-----|-----|-----|----------|--------------|----------|
|     |     |     |     |     | Distance | Group        | Subgroup |
| 164 | 2   | 0   | 0   | 0   | 1        | 28%          | 0%       |
| 193 | 1   | 1   | 0   | 0   | 1.5      | 0%           | 0%       |
| 512 | 1   | 1   | 0   | 0   | 1.5      | 0%           | 0%       |

**BURST Group 55:No. of STs = 3 | Predicted Founder = ST-192**

| ST  | SLV | DLV | TLV | SAT | Average  | ST Bootstrap |          |
|-----|-----|-----|-----|-----|----------|--------------|----------|
|     |     |     |     |     | Distance | Group        | Subgroup |
| 192 | 2   | 0   | 0   | 0   | 1        | 30%          | 0%       |
| 165 | 1   | 1   | 0   | 0   | 1.5      | 0%           | 0%       |
| 220 | 1   | 1   | 0   | 0   | 1.5      | 0%           | 0%       |

**BURST Group 56:No. of STs = 3 | Predicted Founder = ST-139**

| ST  | SLV | DLV | TLV | SAT | Average  | ST Bootstrap |          |
|-----|-----|-----|-----|-----|----------|--------------|----------|
|     |     |     |     |     | Distance | Group        | Subgroup |
| 139 | 2   | 0   | 0   | 0   | 1        | 31%          | 0%       |
| 115 | 1   | 1   | 0   | 0   | 1.5      | 0%           | 0%       |
| 452 | 1   | 1   | 0   | 0   | 1.5      | 0%           | 0%       |

**BURST Group 57:No. of STs = 3 | Predicted Founder = ST-365**

| ST  | SLV | DLV | TLV | SAT | Average  | ST Bootstrap |          |
|-----|-----|-----|-----|-----|----------|--------------|----------|
|     |     |     |     |     | Distance | Group        | Subgroup |
| 365 | 2   | 0   | 0   | 0   | 1        | 33%          | 0%       |
| 922 | 1   | 1   | 0   | 0   | 1.5      | 0%           | 0%       |
| 522 | 1   | 1   | 0   | 0   | 1.5      | 0%           | 0%       |

**BURST Group 58:No. of STs = 3 | Predicted Founder = ST-485**

| ST   | SLV | DLV | TLV | SAT | Average  | ST Bootstrap |          |
|------|-----|-----|-----|-----|----------|--------------|----------|
|      |     |     |     |     | Distance | Group        | Subgroup |
| 485  | 2   | 0   | 0   | 0   | 1        | 30%          | 0%       |
| 855  | 1   | 1   | 0   | 0   | 1.5      | 0%           | 0%       |
| 1033 | 1   | 1   | 0   | 0   | 1.5      | 0%           | 0%       |

**BURST Group 59:No. of STs = 3 | Predicted Founder = ST-389**

| ST  | SLV | DLV | TLV | SAT | Average  | ST Bootstrap |          |
|-----|-----|-----|-----|-----|----------|--------------|----------|
|     |     |     |     |     | Distance | Group        | Subgroup |
| 389 | 2   | 0   | 0   | 0   | 1        | 31%          | 0%       |
| 121 | 1   | 1   | 0   | 0   | 1.5      | 0%           | 0%       |
| 424 | 1   | 1   | 0   | 0   | 1.5      | 0%           | 0%       |

**BURST Group 60:No. of STs = 3 | Predicted Founder = ST-108**

| ST  | SLV | DLV | TLV | SAT | Average  | ST Bootstrap |          |
|-----|-----|-----|-----|-----|----------|--------------|----------|
|     |     |     |     |     | Distance | Group        | Subgroup |
| 108 | 2   | 0   | 0   | 0   | 1        | 30%          | 0%       |
| 425 | 1   | 1   | 0   | 0   | 1.5      | 0%           | 0%       |
| 581 | 1   | 1   | 0   | 0   | 1.5      | 0%           | 0%       |

**BURST Group 61:No. of STs = 3 | Predicted Founder = ST-260**

| ST  | SLV | DLV | TLV | SAT | Average  | ST Bootstrap |          |
|-----|-----|-----|-----|-----|----------|--------------|----------|
|     |     |     |     |     | Distance | Group        | Subgroup |
| 260 | 2   | 0   | 0   | 0   | 1        | 31%          | 0%       |
| 264 | 1   | 1   | 0   | 0   | 1.5      | 0%           | 0%       |
| 503 | 1   | 1   | 0   | 0   | 1.5      | 0%           | 0%       |

**BURST Group 62:No. of STs = 3 | Predicted Founder = ST-236**

| ST  | SLV | DLV | TLV | SAT | Average  | ST Bootstrap |          |
|-----|-----|-----|-----|-----|----------|--------------|----------|
|     |     |     |     |     | Distance | Group        | Subgroup |
| 236 | 2   | 0   | 0   | 0   | 1        | 31%          | 0%       |
| 240 | 1   | 1   | 0   | 0   | 1.5      | 0%           | 0%       |
| 239 | 1   | 1   | 0   | 0   | 1.5      | 0%           | 0%       |

**BURST Group 63:No. of STs = 3 | Predicted Founder = ST-231**

| ST  | SLV | DLV | TLV | SAT | Average  | ST Bootstrap |          |
|-----|-----|-----|-----|-----|----------|--------------|----------|
|     |     |     |     |     | Distance | Group        | Subgroup |
| 231 | 2   | 0   | 0   | 0   | 1        | 34%          | 0%       |
| 376 | 1   | 1   | 0   | 0   | 1.5      | 0%           | 0%       |
| 370 | 1   | 1   | 0   | 0   | 1.5      | 0%           | 0%       |

**BURST Group 64:No. of STs = 3 | Predicted Founder = Multiple**

| ST  | SLV | DLV | TLV | SAT | Average Distance | ST Bootstrap |          |
|-----|-----|-----|-----|-----|------------------|--------------|----------|
|     |     |     |     |     |                  | Group        | Subgroup |
| 525 | 2   | 0   | 0   | 0   | 1                | 8%           | 0%       |
| 354 | 2   | 0   | 0   | 0   | 1                | 9%           | 0%       |
| 350 | 2   | 0   | 0   | 0   | 1                | 13%          | 0%       |

**BURST Group 65:No. of STs = 3 | Predicted Founder = ST-377**

| ST   | SLV | DLV | TLV | SAT | Average Distance | ST Bootstrap |          |
|------|-----|-----|-----|-----|------------------|--------------|----------|
|      |     |     |     |     |                  | Group        | Subgroup |
| 377  | 2   | 0   | 0   | 0   | 1                | 6%           | 0%       |
| 1047 | 2   | 0   | 0   | 0   | 1                | 8%           | 0%       |
| 1028 | 2   | 0   | 0   | 0   | 1                | 14%          | 0%       |

**BURST Group 66:No. of STs = 3 | Predicted Founder = ST-368**

| ST  | SLV | DLV | TLV | SAT | Average Distance | ST Bootstrap |          |
|-----|-----|-----|-----|-----|------------------|--------------|----------|
|     |     |     |     |     |                  | Group        | Subgroup |
| 368 | 2   | 0   | 0   | 0   | 1                | 31%          | 0%       |
| 372 | 1   | 1   | 0   | 0   | 1.5              | 0%           | 0%       |
| 366 | 1   | 1   | 0   | 0   | 1.5              | 0%           | 0%       |

**BURST Group 67:No. of STs = 2 | Predicted Founder = None**

| ST  | SLV | DLV | TLV | SAT | Distance |
|-----|-----|-----|-----|-----|----------|
| 327 | 1   | 0   | 0   | 0   | 1        |
| 325 | 1   | 0   | 0   | 0   | 1        |

**BURST Group 68:No. of STs = 2 | Predicted Founder = None**

| ST  | SLV | DLV | TLV | SAT | Distance |
|-----|-----|-----|-----|-----|----------|
| 685 | 1   | 0   | 0   | 0   | 1        |
| 684 | 1   | 0   | 0   | 0   | 1        |

**BURST Group 69:No. of STs = 2 | Predicted Founder = None**

| ST  | SLV | DLV | TLV | SAT | Distance |
|-----|-----|-----|-----|-----|----------|
| 319 | 1   | 0   | 0   | 0   | 1        |
| 486 | 1   | 0   | 0   | 0   | 1        |

**BURST Group 70:No. of STs = 2 | Predicted Founder = None**

| ST  | SLV | DLV | TLV | SAT | Distance |
|-----|-----|-----|-----|-----|----------|
| 316 | 1   | 0   | 0   | 0   | 1        |
| 507 | 1   | 0   | 0   | 0   | 1        |

**BURST Group 71:No. of STs = 2 | Predicted Founder = None**

| <b>ST</b> | <b>SLV</b> | <b>DLV</b> | <b>TLV</b> | <b>SAT</b> | <b>Distance</b> |
|-----------|------------|------------|------------|------------|-----------------|
| 675       | 1          | 0          | 0          | 0          | 1               |
| 1008      | 1          | 0          | 0          | 0          | 1               |

**BURST Group 72:No. of STs = 2 | Predicted Founder = None**

| <b>ST</b> | <b>SLV</b> | <b>DLV</b> | <b>TLV</b> | <b>SAT</b> | <b>Distance</b> |
|-----------|------------|------------|------------|------------|-----------------|
| 312       | 1          | 0          | 0          | 0          | 1               |
| 279       | 1          | 0          | 0          | 0          | 1               |

**BURST Group 73:No. of STs = 2 | Predicted Founder = None**

| <b>ST</b> | <b>SLV</b> | <b>DLV</b> | <b>TLV</b> | <b>SAT</b> | <b>Distance</b> |
|-----------|------------|------------|------------|------------|-----------------|
| 310       | 1          | 0          | 0          | 0          | 1               |
| 306       | 1          | 0          | 0          | 0          | 1               |

**BURST Group 74:No. of STs = 2 | Predicted Founder = None**

| <b>ST</b> | <b>SLV</b> | <b>DLV</b> | <b>TLV</b> | <b>SAT</b> | <b>Distance</b> |
|-----------|------------|------------|------------|------------|-----------------|
| 307       | 1          | 0          | 0          | 0          | 1               |
| 1027      | 1          | 0          | 0          | 0          | 1               |

**BURST Group 75:No. of STs = 2 | Predicted Founder = None**

| <b>ST</b> | <b>SLV</b> | <b>DLV</b> | <b>TLV</b> | <b>SAT</b> | <b>Distance</b> |
|-----------|------------|------------|------------|------------|-----------------|
| 663       | 1          | 0          | 0          | 0          | 1               |
| 131       | 1          | 0          | 0          | 0          | 1               |

**BURST Group 76:No. of STs = 2 | Predicted Founder = None**

| <b>ST</b> | <b>SLV</b> | <b>DLV</b> | <b>TLV</b> | <b>SAT</b> | <b>Distance</b> |
|-----------|------------|------------|------------|------------|-----------------|
| 300       | 1          | 0          | 0          | 0          | 1               |
| 491       | 1          | 0          | 0          | 0          | 1               |

**BURST Group 77:No. of STs = 2 | Predicted Founder = None**

| <b>ST</b> | <b>SLV</b> | <b>DLV</b> | <b>TLV</b> | <b>SAT</b> | <b>Distance</b> |
|-----------|------------|------------|------------|------------|-----------------|
| 642       | 1          | 0          | 0          | 0          | 1               |
| 211       | 1          | 0          | 0          | 0          | 1               |

**BURST Group 78:No. of STs = 2 | Predicted Founder = None**

| <b>ST</b> | <b>SLV</b> | <b>DLV</b> | <b>TLV</b> | <b>SAT</b> | <b>Distance</b> |
|-----------|------------|------------|------------|------------|-----------------|
| 639       | 1          | 0          | 0          | 0          | 1               |
| 853       | 1          | 0          | 0          | 0          | 1               |



**BURST Group 79:No. of STs = 2 | Predicted Founder = None**

| <b>ST</b> | <b>SLV</b> | <b>DLV</b> | <b>TLV</b> | <b>SAT</b> | <b>Distance</b> |
|-----------|------------|------------|------------|------------|-----------------|
| 635       | 1          | 0          | 0          | 0          | 1               |
| 480       | 1          | 0          | 0          | 0          | 1               |

**BURST Group 80:No. of STs = 2 | Predicted Founder = None**

| <b>ST</b> | <b>SLV</b> | <b>DLV</b> | <b>TLV</b> | <b>SAT</b> | <b>Distance</b> |
|-----------|------------|------------|------------|------------|-----------------|
| 633       | 1          | 0          | 0          | 0          | 1               |
| 1066      | 1          | 0          | 0          | 0          | 1               |

**BURST Group 81:No. of STs = 2 | Predicted Founder = None**

| <b>ST</b> | <b>SLV</b> | <b>DLV</b> | <b>TLV</b> | <b>SAT</b> | <b>Distance</b> |
|-----------|------------|------------|------------|------------|-----------------|
| 198       | 1          | 0          | 0          | 0          | 1               |
| 1048      | 1          | 0          | 0          | 0          | 1               |

**BURST Group 82:No. of STs = 2 | Predicted Founder = None**

| <b>ST</b> | <b>SLV</b> | <b>DLV</b> | <b>TLV</b> | <b>SAT</b> | <b>Distance</b> |
|-----------|------------|------------|------------|------------|-----------------|
| 197       | 1          | 0          | 0          | 0          | 1               |
| 125       | 1          | 0          | 0          | 0          | 1               |

**BURST Group 83:No. of STs = 2 | Predicted Founder = None**

| <b>ST</b> | <b>SLV</b> | <b>DLV</b> | <b>TLV</b> | <b>SAT</b> | <b>Distance</b> |
|-----------|------------|------------|------------|------------|-----------------|
| 190       | 1          | 0          | 0          | 0          | 1               |
| 566       | 1          | 0          | 0          | 0          | 1               |

**BURST Group 84:No. of STs = 2 | Predicted Founder = None**

| <b>ST</b> | <b>SLV</b> | <b>DLV</b> | <b>TLV</b> | <b>SAT</b> | <b>Distance</b> |
|-----------|------------|------------|------------|------------|-----------------|
| 981       | 1          | 0          | 0          | 0          | 1               |
| 880       | 1          | 0          | 0          | 0          | 1               |

**BURST Group 85:No. of STs = 2 | Predicted Founder = None**

| <b>ST</b> | <b>SLV</b> | <b>DLV</b> | <b>TLV</b> | <b>SAT</b> | <b>Distance</b> |
|-----------|------------|------------|------------|------------|-----------------|
| 184       | 1          | 0          | 0          | 0          | 1               |
| 160       | 1          | 0          | 0          | 0          | 1               |

**BURST Group 86:No. of STs = 2 | Predicted Founder = None**

| <b>ST</b> | <b>SLV</b> | <b>DLV</b> | <b>TLV</b> | <b>SAT</b> | <b>Distance</b> |
|-----------|------------|------------|------------|------------|-----------------|
| 974       | 1          | 0          | 0          | 0          | 1               |
| 413       | 1          | 0          | 0          | 0          | 1               |

**BURST Group 87:No. of STs = 2 | Predicted Founder = None**

| <b>ST</b> | <b>SLV</b> | <b>DLV</b> | <b>TLV</b> | <b>SAT</b> | <b>Distance</b> |
|-----------|------------|------------|------------|------------|-----------------|
| 611       | 1          | 0          | 0          | 0          | 1               |
| 767       | 1          | 0          | 0          | 0          | 1               |

**BURST Group 88:No. of STs = 2 | Predicted Founder = None**

| <b>ST</b> | <b>SLV</b> | <b>DLV</b> | <b>TLV</b> | <b>SAT</b> | <b>Distance</b> |
|-----------|------------|------------|------------|------------|-----------------|
| 177       | 1          | 0          | 0          | 0          | 1               |
| 176       | 1          | 0          | 0          | 0          | 1               |

**BURST Group 89:No. of STs = 2 | Predicted Founder = None**

| <b>ST</b> | <b>SLV</b> | <b>DLV</b> | <b>TLV</b> | <b>SAT</b> | <b>Distance</b> |
|-----------|------------|------------|------------|------------|-----------------|
| 173       | 1          | 0          | 0          | 0          | 1               |
| 1031      | 1          | 0          | 0          | 0          | 1               |

**BURST Group 90:No. of STs = 2 | Predicted Founder = None**

| <b>ST</b> | <b>SLV</b> | <b>DLV</b> | <b>TLV</b> | <b>SAT</b> | <b>Distance</b> |
|-----------|------------|------------|------------|------------|-----------------|
| 965       | 1          | 0          | 0          | 0          | 1               |
| 528       | 1          | 0          | 0          | 0          | 1               |

**BURST Group 91:No. of STs = 2 | Predicted Founder = None**

| <b>ST</b> | <b>SLV</b> | <b>DLV</b> | <b>TLV</b> | <b>SAT</b> | <b>Distance</b> |
|-----------|------------|------------|------------|------------|-----------------|
| 564       | 1          | 0          | 0          | 0          | 1               |
| 604       | 1          | 0          | 0          | 0          | 1               |

**BURST Group 92:No. of STs = 2 | Predicted Founder = None**

| <b>ST</b> | <b>SLV</b> | <b>DLV</b> | <b>TLV</b> | <b>SAT</b> | <b>Distance</b> |
|-----------|------------|------------|------------|------------|-----------------|
| 601       | 1          | 0          | 0          | 0          | 1               |
| 53        | 1          | 0          | 0          | 0          | 1               |

**BURST Group 93:No. of STs = 2 | Predicted Founder = None**

| <b>ST</b> | <b>SLV</b> | <b>DLV</b> | <b>TLV</b> | <b>SAT</b> | <b>Distance</b> |
|-----------|------------|------------|------------|------------|-----------------|
| 954       | 1          | 0          | 0          | 0          | 1               |
| 281       | 1          | 0          | 0          | 0          | 1               |

**BURST Group 94:No. of STs = 2 | Predicted Founder = None**

| <b>ST</b> | <b>SLV</b> | <b>DLV</b> | <b>TLV</b> | <b>SAT</b> | <b>Distance</b> |
|-----------|------------|------------|------------|------------|-----------------|
| 931       | 1          | 0          | 0          | 0          | 1               |
| 881       | 1          | 0          | 0          | 0          | 1               |

**BURST Group 95:No. of STs = 2 | Predicted Founder = None**

| <b>ST</b> | <b>SLV</b> | <b>DLV</b> | <b>TLV</b> | <b>SAT</b> | <b>Distance</b> |
|-----------|------------|------------|------------|------------|-----------------|
| 701       | 1          | 0          | 0          | 0          | 1               |
| 493       | 1          | 0          | 0          | 0          | 1               |

**BURST Group 96:No. of STs = 2 | Predicted Founder = None**

| <b>ST</b> | <b>SLV</b> | <b>DLV</b> | <b>TLV</b> | <b>SAT</b> | <b>Distance</b> |
|-----------|------------|------------|------------|------------|-----------------|
| 490       | 1          | 0          | 0          | 0          | 1               |
| 535       | 1          | 0          | 0          | 0          | 1               |

**BURST Group 97:No. of STs = 2 | Predicted Founder = None**

| <b>ST</b> | <b>SLV</b> | <b>DLV</b> | <b>TLV</b> | <b>SAT</b> | <b>Distance</b> |
|-----------|------------|------------|------------|------------|-----------------|
| 487       | 1          | 0          | 0          | 0          | 1               |
| 737       | 1          | 0          | 0          | 0          | 1               |

**BURST Group 98:No. of STs = 2 | Predicted Founder = None**

| <b>ST</b> | <b>SLV</b> | <b>DLV</b> | <b>TLV</b> | <b>SAT</b> | <b>Distance</b> |
|-----------|------------|------------|------------|------------|-----------------|
| 917       | 1          | 0          | 0          | 0          | 1               |
| 214       | 1          | 0          | 0          | 0          | 1               |

**BURST Group 99:No. of STs = 2 | Predicted Founder = None**

| <b>ST</b> | <b>SLV</b> | <b>DLV</b> | <b>TLV</b> | <b>SAT</b> | <b>Distance</b> |
|-----------|------------|------------|------------|------------|-----------------|
| 475       | 1          | 0          | 0          | 0          | 1               |
| 527       | 1          | 0          | 0          | 0          | 1               |

**BURST Group 100:No. of STs = 2 | Predicted Founder = None**

| <b>ST</b> | <b>SLV</b> | <b>DLV</b> | <b>TLV</b> | <b>SAT</b> | <b>Distance</b> |
|-----------|------------|------------|------------|------------|-----------------|
| 110       | 1          | 0          | 0          | 0          | 1               |
| 363       | 1          | 0          | 0          | 0          | 1               |

**BURST Group 101:No. of STs = 2 | Predicted Founder = None**

| <b>ST</b> | <b>SLV</b> | <b>DLV</b> | <b>TLV</b> | <b>SAT</b> | <b>Distance</b> |
|-----------|------------|------------|------------|------------|-----------------|
| 455       | 1          | 0          | 0          | 0          | 1               |
| 578       | 1          | 0          | 0          | 0          | 1               |

**BURST Group 102:No. of STs = 2 | Predicted Founder = None**

| <b>ST</b> | <b>SLV</b> | <b>DLV</b> | <b>TLV</b> | <b>SAT</b> | <b>Distance</b> |
|-----------|------------|------------|------------|------------|-----------------|
| 448       | 1          | 0          | 0          | 0          | 1               |
| 447       | 1          | 0          | 0          | 0          | 1               |

**BURST Group 103:No. of STs = 2 | Predicted Founder = None**

| <b>ST</b> | <b>SLV</b> | <b>DLV</b> | <b>TLV</b> | <b>SAT</b> | <b>Distance</b> |
|-----------|------------|------------|------------|------------|-----------------|
| 440       | 1          | 0          | 0          | 0          | 1               |
| 267       | 1          | 0          | 0          | 0          | 1               |

**BURST Group 104:No. of STs = 2 | Predicted Founder = None**

| <b>ST</b> | <b>SLV</b> | <b>DLV</b> | <b>TLV</b> | <b>SAT</b> | <b>Distance</b> |
|-----------|------------|------------|------------|------------|-----------------|
| 439       | 1          | 0          | 0          | 0          | 1               |
| 515       | 1          | 0          | 0          | 0          | 1               |

**BURST Group 105:No. of STs = 2 | Predicted Founder = None**

| <b>ST</b> | <b>SLV</b> | <b>DLV</b> | <b>TLV</b> | <b>SAT</b> | <b>Distance</b> |
|-----------|------------|------------|------------|------------|-----------------|
| 799       | 1          | 0          | 0          | 0          | 1               |
| 800       | 1          | 0          | 0          | 0          | 1               |

**BURST Group 106:No. of STs = 2 | Predicted Founder = None**

| <b>ST</b> | <b>SLV</b> | <b>DLV</b> | <b>TLV</b> | <b>SAT</b> | <b>Distance</b> |
|-----------|------------|------------|------------|------------|-----------------|
| 798       | 1          | 0          | 0          | 0          | 1               |
| 736       | 1          | 0          | 0          | 0          | 1               |

**BURST Group 107:No. of STs = 2 | Predicted Founder = None**

| <b>ST</b> | <b>SLV</b> | <b>DLV</b> | <b>TLV</b> | <b>SAT</b> | <b>Distance</b> |
|-----------|------------|------------|------------|------------|-----------------|
| 434       | 1          | 0          | 0          | 0          | 1               |
| 840       | 1          | 0          | 0          | 0          | 1               |

**BURST Group 108:No. of STs = 2 | Predicted Founder = None**

| <b>ST</b> | <b>SLV</b> | <b>DLV</b> | <b>TLV</b> | <b>SAT</b> | <b>Distance</b> |
|-----------|------------|------------|------------|------------|-----------------|
| 433       | 1          | 0          | 0          | 0          | 1               |
| 552       | 1          | 0          | 0          | 0          | 1               |

**BURST Group 109:No. of STs = 2 | Predicted Founder = None**

| <b>ST</b> | <b>SLV</b> | <b>DLV</b> | <b>TLV</b> | <b>SAT</b> | <b>Distance</b> |
|-----------|------------|------------|------------|------------|-----------------|
| 428       | 1          | 0          | 0          | 0          | 1               |
| 427       | 1          | 0          | 0          | 0          | 1               |

**BURST Group 110:No. of STs = 2 | Predicted Founder = None**

| <b>ST</b> | <b>SLV</b> | <b>DLV</b> | <b>TLV</b> | <b>SAT</b> | <b>Distance</b> |
|-----------|------------|------------|------------|------------|-----------------|
| 788       | 1          | 0          | 0          | 0          | 1               |
| 787       | 1          | 0          | 0          | 0          | 1               |

**BURST Group 111:No. of STs = 2 | Predicted Founder = None**

| <b>ST</b> | <b>SLV</b> | <b>DLV</b> | <b>TLV</b> | <b>SAT</b> | <b>Distance</b> |
|-----------|------------|------------|------------|------------|-----------------|
| 257       | 1          | 0          | 0          | 0          | 1               |
| 780       | 1          | 0          | 0          | 0          | 1               |

**BURST Group 112:No. of STs = 2 | Predicted Founder = None**

| <b>ST</b> | <b>SLV</b> | <b>DLV</b> | <b>TLV</b> | <b>SAT</b> | <b>Distance</b> |
|-----------|------------|------------|------------|------------|-----------------|
| 262       | 1          | 0          | 0          | 0          | 1               |
| 774       | 1          | 0          | 0          | 0          | 1               |

**BURST Group 113:No. of STs = 2 | Predicted Founder = None**

| <b>ST</b> | <b>SLV</b> | <b>DLV</b> | <b>TLV</b> | <b>SAT</b> | <b>Distance</b> |
|-----------|------------|------------|------------|------------|-----------------|
| 761       | 1          | 0          | 0          | 0          | 1               |
| 591       | 1          | 0          | 0          | 0          | 1               |

**BURST Group 114:No. of STs = 2 | Predicted Founder = None**

| <b>ST</b> | <b>SLV</b> | <b>DLV</b> | <b>TLV</b> | <b>SAT</b> | <b>Distance</b> |
|-----------|------------|------------|------------|------------|-----------------|
| 756       | 1          | 0          | 0          | 0          | 1               |
| 712       | 1          | 0          | 0          | 0          | 1               |

**BURST Group 115:No. of STs = 2 | Predicted Founder = None**

| <b>ST</b> | <b>SLV</b> | <b>DLV</b> | <b>TLV</b> | <b>SAT</b> | <b>Distance</b> |
|-----------|------------|------------|------------|------------|-----------------|
| 755       | 1          | 0          | 0          | 0          | 1               |
| 751       | 1          | 0          | 0          | 0          | 1               |

**BURST Group 116:No. of STs = 2 | Predicted Founder = None**

| <b>ST</b> | <b>SLV</b> | <b>DLV</b> | <b>TLV</b> | <b>SAT</b> | <b>Distance</b> |
|-----------|------------|------------|------------|------------|-----------------|
| 234       | 1          | 0          | 0          | 0          | 1               |
| 754       | 1          | 0          | 0          | 0          | 1               |

**BURST Group 117:No. of STs = 2 | Predicted Founder = None**

| <b>ST</b> | <b>SLV</b> | <b>DLV</b> | <b>TLV</b> | <b>SAT</b> | <b>Distance</b> |
|-----------|------------|------------|------------|------------|-----------------|
| 746       | 1          | 0          | 0          | 0          | 1               |
| 357       | 1          | 0          | 0          | 0          | 1               |

**BURST Group 118:No. of STs = 2 | Predicted Founder = None**

| <b>ST</b> | <b>SLV</b> | <b>DLV</b> | <b>TLV</b> | <b>SAT</b> | <b>Distance</b> |
|-----------|------------|------------|------------|------------|-----------------|
| 733       | 1          | 0          | 0          | 0          | 1               |
| 392       | 1          | 0          | 0          | 0          | 1               |

**BURST Group 119:No. of STs = 2 | Predicted Founder = None**

| <b>ST</b> | <b>SLV</b> | <b>DLV</b> | <b>TLV</b> | <b>SAT</b> | <b>Distance</b> |
|-----------|------------|------------|------------|------------|-----------------|
| 532       | 1          | 0          | 0          | 0          | 1               |
| 297       | 1          | 0          | 0          | 0          | 1               |

**BURST Group 120:No. of STs = 2 | Predicted Founder = None**

| <b>ST</b> | <b>SLV</b> | <b>DLV</b> | <b>TLV</b> | <b>SAT</b> | <b>Distance</b> |
|-----------|------------|------------|------------|------------|-----------------|
| 296       | 1          | 0          | 0          | 0          | 1               |
| 538       | 1          | 0          | 0          | 0          | 1               |

**BURST Group 121:No. of STs = 2 | Predicted Founder = None**

| <b>ST</b> | <b>SLV</b> | <b>DLV</b> | <b>TLV</b> | <b>SAT</b> | <b>Distance</b> |
|-----------|------------|------------|------------|------------|-----------------|
| 288       | 1          | 0          | 0          | 0          | 1               |
| 287       | 1          | 0          | 0          | 0          | 1               |

**BURST Group 122:No. of STs = 2 | Predicted Founder = None**

| <b>ST</b> | <b>SLV</b> | <b>DLV</b> | <b>TLV</b> | <b>SAT</b> | <b>Distance</b> |
|-----------|------------|------------|------------|------------|-----------------|
| 719       | 1          | 0          | 0          | 0          | 1               |
| 224       | 1          | 0          | 0          | 0          | 1               |

**BURST Group 123:No. of STs = 2 | Predicted Founder = None**

| <b>ST</b> | <b>SLV</b> | <b>DLV</b> | <b>TLV</b> | <b>SAT</b> | <b>Distance</b> |
|-----------|------------|------------|------------|------------|-----------------|
| 266       | 1          | 0          | 0          | 0          | 1               |
| 873       | 1          | 0          | 0          | 0          | 1               |

**BURST Group 124:No. of STs = 2 | Predicted Founder = None**

| <b>ST</b> | <b>SLV</b> | <b>DLV</b> | <b>TLV</b> | <b>SAT</b> | <b>Distance</b> |
|-----------|------------|------------|------------|------------|-----------------|
| 265       | 1          | 0          | 0          | 0          | 1               |
| 248       | 1          | 0          | 0          | 0          | 1               |

**BURST Group 125:No. of STs = 2 | Predicted Founder = None**

| <b>ST</b> | <b>SLV</b> | <b>DLV</b> | <b>TLV</b> | <b>SAT</b> | <b>Distance</b> |
|-----------|------------|------------|------------|------------|-----------------|
| 261       | 1          | 0          | 0          | 0          | 1               |
| 810       | 1          | 0          | 0          | 0          | 1               |

**BURST Group 126:No. of STs = 2 | Predicted Founder = None**

| <b>ST</b> | <b>SLV</b> | <b>DLV</b> | <b>TLV</b> | <b>SAT</b> | <b>Distance</b> |
|-----------|------------|------------|------------|------------|-----------------|
| 596       | 1          | 0          | 0          | 0          | 1               |
| 871       | 1          | 0          | 0          | 0          | 1               |

**BURST Group 127:No. of STs = 2 | Predicted Founder = None**

| <b>ST</b> | <b>SLV</b> | <b>DLV</b> | <b>TLV</b> | <b>SAT</b> | <b>Distance</b> |
|-----------|------------|------------|------------|------------|-----------------|
| 575       | 1          | 0          | 0          | 0          | 1               |
| 1003      | 1          | 0          | 0          | 0          | 1               |

**BURST Group 128:No. of STs = 2 | Predicted Founder = None**

| <b>ST</b> | <b>SLV</b> | <b>DLV</b> | <b>TLV</b> | <b>SAT</b> | <b>Distance</b> |
|-----------|------------|------------|------------|------------|-----------------|
| 555       | 1          | 0          | 0          | 0          | 1               |
| 573       | 1          | 0          | 0          | 0          | 1               |

**BURST Group 129:No. of STs = 2 | Predicted Founder = None**

| <b>ST</b> | <b>SLV</b> | <b>DLV</b> | <b>TLV</b> | <b>SAT</b> | <b>Distance</b> |
|-----------|------------|------------|------------|------------|-----------------|
| 554       | 1          | 0          | 0          | 0          | 1               |
| 804       | 1          | 0          | 0          | 0          | 1               |

**BURST Group 130:No. of STs = 2 | Predicted Founder = None**

| <b>ST</b> | <b>SLV</b> | <b>DLV</b> | <b>TLV</b> | <b>SAT</b> | <b>Distance</b> |
|-----------|------------|------------|------------|------------|-----------------|
| 543       | 1          | 0          | 0          | 0          | 1               |
| 1054      | 1          | 0          | 0          | 0          | 1               |

**BURST Group 131:No. of STs = 2 | Predicted Founder = None**

| <b>ST</b> | <b>SLV</b> | <b>DLV</b> | <b>TLV</b> | <b>SAT</b> | <b>Distance</b> |
|-----------|------------|------------|------------|------------|-----------------|
| 889       | 1          | 0          | 0          | 0          | 1               |
| 884       | 1          | 0          | 0          | 0          | 1               |

**BURST Group 132:No. of STs = 2 | Predicted Founder = None**

| <b>ST</b> | <b>SLV</b> | <b>DLV</b> | <b>TLV</b> | <b>SAT</b> | <b>Distance</b> |
|-----------|------------|------------|------------|------------|-----------------|
| 859       | 1          | 0          | 0          | 0          | 1               |
| 858       | 1          | 0          | 0          | 0          | 1               |

**BURST Group 133:No. of STs = 2 | Predicted Founder = None**

| <b>ST</b> | <b>SLV</b> | <b>DLV</b> | <b>TLV</b> | <b>SAT</b> | <b>Distance</b> |
|-----------|------------|------------|------------|------------|-----------------|
| 1067      | 1          | 0          | 0          | 0          | 1               |
| 1009      | 1          | 0          | 0          | 0          | 1               |

**BURST Group 134:No. of STs = 2 | Predicted Founder = None**

| <b>ST</b> | <b>SLV</b> | <b>DLV</b> | <b>TLV</b> | <b>SAT</b> | <b>Distance</b> |
|-----------|------------|------------|------------|------------|-----------------|
| 843       | 1          | 0          | 0          | 0          | 1               |
| 3         | 1          | 0          | 0          | 0          | 1               |

**BURST Group 135:No. of STs = 2 | Predicted Founder = None**

| <b>ST</b> | <b>SLV</b> | <b>DLV</b> | <b>TLV</b> | <b>SAT</b> | <b>Distance</b> |
|-----------|------------|------------|------------|------------|-----------------|
| 397       | 1          | 0          | 0          | 0          | 1               |
| 396       | 1          | 0          | 0          | 0          | 1               |

**BURST Group 136:No. of STs = 2 | Predicted Founder = None**

| <b>ST</b> | <b>SLV</b> | <b>DLV</b> | <b>TLV</b> | <b>SAT</b> | <b>Distance</b> |
|-----------|------------|------------|------------|------------|-----------------|
| 386       | 1          | 0          | 0          | 0          | 1               |
| 394       | 1          | 0          | 0          | 0          | 1               |

**BURST Group 137:No. of STs = 2 | Predicted Founder = None**

| <b>ST</b> | <b>SLV</b> | <b>DLV</b> | <b>TLV</b> | <b>SAT</b> | <b>Distance</b> |
|-----------|------------|------------|------------|------------|-----------------|
| 52        | 1          | 0          | 0          | 0          | 1               |
| 45        | 1          | 0          | 0          | 0          | 1               |

**BURST Group 138:No. of STs = 2 | Predicted Founder = None**

| <b>ST</b> | <b>SLV</b> | <b>DLV</b> | <b>TLV</b> | <b>SAT</b> | <b>Distance</b> |
|-----------|------------|------------|------------|------------|-----------------|
| 381       | 1          | 0          | 0          | 0          | 1               |
| 343       | 1          | 0          | 0          | 0          | 1               |

**BURST Group 139:No. of STs = 2 | Predicted Founder = None**

| <b>ST</b> | <b>SLV</b> | <b>DLV</b> | <b>TLV</b> | <b>SAT</b> | <b>Distance</b> |
|-----------|------------|------------|------------|------------|-----------------|
| 46        | 1          | 0          | 0          | 0          | 1               |
| 38        | 1          | 0          | 0          | 0          | 1               |

**BURST Group 140:No. of STs = 2 | Predicted Founder = None**

| <b>ST</b> | <b>SLV</b> | <b>DLV</b> | <b>TLV</b> | <b>SAT</b> | <b>Distance</b> |
|-----------|------------|------------|------------|------------|-----------------|
| 347       | 1          | 0          | 0          | 0          | 1               |
| 43        | 1          | 0          | 0          | 0          | 1               |

**BURST Group 141:No. of STs = 2 | Predicted Founder = None**

| <b>ST</b> | <b>SLV</b> | <b>DLV</b> | <b>TLV</b> | <b>SAT</b> | <b>Distance</b> |
|-----------|------------|------------|------------|------------|-----------------|
| 1021      | 1          | 0          | 0          | 0          | 1               |
| 341       | 1          | 0          | 0          | 0          | 1               |

**BURST Group 142:No. of STs = 2 | Predicted Founder = None**

| <b>ST</b> | <b>SLV</b> | <b>DLV</b> | <b>TLV</b> | <b>SAT</b> | <b>Distance</b> |
|-----------|------------|------------|------------|------------|-----------------|
| 39        | 1          | 0          | 0          | 0          | 1               |
| 31        | 1          | 0          | 0          | 0          | 1               |



**BURST Group 143:No. of STs = 2 | Predicted Founder = None**

| <b>ST</b> | <b>SLV</b> | <b>DLV</b> | <b>TLV</b> | <b>SAT</b> | <b>Distance</b> |
|-----------|------------|------------|------------|------------|-----------------|
| 806       | 1          | 0          | 0          | 0          | 1               |
| 805       | 1          | 0          | 0          | 0          | 1               |

**BURST Group 144:No. of STs = 2 | Predicted Founder = None**

| <b>ST</b> | <b>SLV</b> | <b>DLV</b> | <b>TLV</b> | <b>SAT</b> | <b>Distance</b> |
|-----------|------------|------------|------------|------------|-----------------|
| 801       | 1          | 0          | 0          | 0          | 1               |
| 4         | 1          | 0          | 0          | 0          | 1               |

**BURST Group 145:No. of STs = 2 | Predicted Founder = None**

| <b>ST</b> | <b>SLV</b> | <b>DLV</b> | <b>TLV</b> | <b>SAT</b> | <b>Distance</b> |
|-----------|------------|------------|------------|------------|-----------------|
| 356       | 1          | 0          | 0          | 0          | 1               |
| 355       | 1          | 0          | 0          | 0          | 1               |

**Singletons: No. of STs = 514**

|    |    |     |     |     |     |     |     |     |
|----|----|-----|-----|-----|-----|-----|-----|-----|
| 1  | 44 | 79  | 123 | 203 | 295 | 393 | 477 | 559 |
| 2  | 47 | 80  | 124 | 204 | 299 | 402 | 478 | 563 |
| 5  | 48 | 81  | 126 | 205 | 301 | 404 | 479 | 565 |
| 6  | 49 | 82  | 127 | 206 | 302 | 408 | 483 | 567 |
| 7  | 50 | 83  | 130 | 207 | 303 | 409 | 488 | 570 |
| 8  | 51 | 84  | 134 | 208 | 305 | 415 | 492 | 572 |
| 10 | 54 | 85  | 135 | 212 | 314 | 419 | 494 | 574 |
| 11 | 55 | 86  | 136 | 213 | 315 | 422 | 496 | 582 |
| 12 | 56 | 87  | 138 | 215 | 324 | 423 | 499 | 584 |
| 15 | 57 | 88  | 143 | 216 | 326 | 426 | 500 | 585 |
| 16 | 58 | 89  | 144 | 218 | 328 | 430 | 501 | 586 |
| 18 | 59 | 90  | 145 | 221 | 330 | 431 | 504 | 587 |
| 19 | 60 | 91  | 147 | 222 | 333 | 435 | 506 | 588 |
| 20 | 61 | 92  | 149 | 225 | 335 | 436 | 511 | 590 |
| 21 | 62 | 93  | 150 | 229 | 337 | 437 | 516 | 592 |
| 22 | 63 | 94  | 151 | 246 | 344 | 438 | 517 | 599 |
| 23 | 64 | 95  | 154 | 249 | 346 | 451 | 518 | 600 |
| 24 | 65 | 96  | 161 | 251 | 351 | 453 | 519 | 603 |
| 25 | 66 | 97  | 162 | 255 | 352 | 454 | 521 | 605 |
| 26 | 67 | 98  | 166 | 259 | 358 | 459 | 524 | 606 |
| 28 | 68 | 99  | 168 | 263 | 359 | 460 | 526 | 609 |
| 29 | 69 | 100 | 169 | 270 | 361 | 463 | 530 | 610 |
| 30 | 70 | 103 | 172 | 271 | 362 | 464 | 531 | 612 |
| 32 | 71 | 104 | 183 | 275 | 369 | 465 | 537 | 613 |
| 33 | 72 | 105 | 186 | 285 | 375 | 467 | 542 | 614 |
| 34 | 73 | 106 | 189 | 286 | 379 | 469 | 545 | 616 |
| 35 | 74 | 107 | 191 | 289 | 382 | 470 | 548 | 617 |
| 36 | 75 | 114 | 194 | 290 | 383 | 472 | 550 | 621 |
| 37 | 76 | 116 | 196 | 291 | 388 | 473 | 553 | 623 |
| 40 | 77 | 117 | 199 | 292 | 390 | 474 | 557 | 624 |
| 42 | 78 | 122 | 200 | 293 | 391 | 476 | 558 | 627 |

**Singletons (continued)**

|     |     |     |     |      |
|-----|-----|-----|-----|------|
| 631 | 748 | 841 | 913 | 1000 |
| 634 | 750 | 842 | 915 | 1002 |
| 637 | 757 | 844 | 916 | 1005 |
| 640 | 759 | 846 | 918 | 1006 |
| 643 | 760 | 849 | 919 | 1007 |
| 644 | 762 | 850 | 921 | 1011 |
| 646 | 763 | 851 | 923 | 1014 |
| 647 | 764 | 852 | 925 | 1016 |
| 649 | 765 | 854 | 926 | 1018 |
| 657 | 768 | 856 | 927 | 1019 |
| 662 | 769 | 857 | 928 | 1020 |
| 664 | 770 | 860 | 929 | 1022 |
| 670 | 771 | 863 | 930 | 1023 |
| 672 | 773 | 865 | 933 | 1024 |
| 673 | 776 | 867 | 935 | 1026 |
| 674 | 777 | 868 | 939 | 1029 |
| 679 | 778 | 869 | 940 | 1030 |
| 689 | 779 | 870 | 941 | 1032 |
| 690 | 781 | 872 | 942 | 1034 |
| 693 | 789 | 874 | 943 | 1035 |
| 694 | 790 | 875 | 945 | 1039 |
| 697 | 792 | 876 | 946 | 1040 |
| 698 | 793 | 877 | 947 | 1042 |
| 703 | 794 | 878 | 948 | 1044 |
| 704 | 795 | 879 | 949 | 1045 |
| 705 | 796 | 882 | 955 | 1046 |
| 706 | 802 | 885 | 957 | 1049 |
| 707 | 807 | 888 | 960 | 1050 |
| 708 | 809 | 890 | 961 | 1051 |
| 710 | 812 | 892 | 962 | 1053 |
| 711 | 813 | 893 | 963 | 1057 |
| 713 | 815 | 894 | 967 | 1059 |
| 714 | 816 | 895 | 969 | 1060 |
| 715 | 817 | 897 | 971 | 1061 |
| 716 | 818 | 898 | 972 | 1062 |
| 717 | 819 | 899 | 975 | 1063 |
| 718 | 820 | 900 | 979 | 1064 |
| 720 | 821 | 901 | 982 | 1069 |
| 721 | 822 | 902 | 983 | 1070 |
| 722 | 823 | 903 | 985 |      |
| 723 | 825 | 904 | 987 |      |
| 724 | 826 | 905 | 988 |      |
| 725 | 827 | 906 | 991 |      |
| 726 | 829 | 907 | 992 |      |
| 727 | 830 | 908 | 993 |      |
| 728 | 831 | 909 | 994 |      |
| 732 | 832 | 910 | 995 |      |
| 735 | 836 | 911 | 998 |      |
| 744 | 837 | 912 | 999 |      |
